# Supplementary material
Source: MDPI journal article supplement (https://www.mdpi.com/2227-7080/8/4/75)
Supplement: s1 [file s1]

WEARABLE DEVICE: Amazfit

Reviewer: Dr. Koyya, Grace, Maddisor

|                                                              | BCT<br>present?                     | Comments                                       |                                                                 | BCT<br>present?                     | Comments      |
|--------------------------------------------------------------|-------------------------------------|------------------------------------------------|-----------------------------------------------------------------|-------------------------------------|---------------|
| 1. Goals and planning                                        |                                     |                                                | 10.5 Social incentive                                           | <input type="checkbox"/>            |               |
| 1.1 Goal setting (behavior)                                  | <input checked="" type="checkbox"/> | steps per day                                  | 10.6 Non-specific incentive                                     | <input type="checkbox"/>            |               |
| 1.2 Problem solving                                          | <input type="checkbox"/>            |                                                | 10.7 Self-incentive                                             | <input type="checkbox"/>            |               |
| 1.3 Goal setting (outcome)                                   | <input checked="" type="checkbox"/> |                                                | 10.8 Incentive (outcome)                                        | <input type="checkbox"/>            |               |
| 1.4 Action planning                                          | <input type="checkbox"/>            |                                                | 10.9 Self-reward                                                | <input type="checkbox"/>            |               |
| 1.5 Review behavior goal(s)                                  | <input checked="" type="checkbox"/> |                                                | 10.10 Reward (outcome)                                          | <input type="checkbox"/>            |               |
| 1.6 Discrepancy between<br>current behavior and goal         | <input checked="" type="checkbox"/> |                                                | 10.11 Future punishment                                         | <input checked="" type="checkbox"/> | Broken streak |
| 1.7 Review outcome goal(s)                                   | <input checked="" type="checkbox"/> |                                                | 11. Regulation                                                  |                                     |               |
| 1.8 Behavioral contract                                      | <input checked="" type="checkbox"/> | agree on selecting a goal                      | 11.1 Pharmacological<br>support                                 | <input type="checkbox"/>            |               |
| 1.9 Commitment                                               | <input type="checkbox"/>            |                                                | 11.2 Reduce negative<br>emotions                                | <input type="checkbox"/>            |               |
| 2. Feedback and monitoring                                   |                                     |                                                | 11.3 Conserving mental<br>resources                             | <input type="checkbox"/>            |               |
| 2.1 Monitoring of behavior by<br>others without feedback     | <input type="checkbox"/>            | The watch display allows for constant feedback | 11.4 Paradoxical instructions                                   | <input type="checkbox"/>            |               |
| 2.2 Feedback on behavior                                     | <input checked="" type="checkbox"/> |                                                | 12. Antecedents                                                 |                                     |               |
| 2.3 Self-monitoring of behavior                              | <input checked="" type="checkbox"/> |                                                | 12.1 Restructuring the<br>physical environment                  | <input checked="" type="checkbox"/> |               |
| 2.4 Self-monitoring of<br>outcome(s) of behavior             | <input checked="" type="checkbox"/> |                                                | 12.2 Restructuring the social<br>environment                    | <input type="checkbox"/>            |               |
| 2.5 Monitoring of outcome(s)<br>of behavior without feedback | <input type="checkbox"/>            |                                                | 12.3 Avoidance/reducing<br>exposure to cues for the<br>behavior | <input type="checkbox"/>            |               |
| 2.6 Biofeedback                                              | <input checked="" type="checkbox"/> | Heart rate                                     | 12.4 Distraction                                                | <input type="checkbox"/>            |               |
| 2.7 Feedback on outcome(s) of<br>behavior                    | <input checked="" type="checkbox"/> |                                                | 12.5 Adding objects to the<br>environment                       | <input checked="" type="checkbox"/> |               |
| 3. Social support                                            |                                     |                                                | 12.6 Body changes                                               | <input type="checkbox"/>            |               |
| 3.1. Social support<br>(unspecified)                         | <input checked="" type="checkbox"/> |                                                | 13. Identity                                                    |                                     |               |
| 3.2. Social support (practical)                              | <input type="checkbox"/>            |                                                | 13.1 Identification of the self<br>as role model                | <input type="checkbox"/>            |               |

WEARABLE DEVICE: Amazfit

Reviewer:

Dr. Koyya, Grace, Maddison

|                                                             |                                     |                          |                                                 |                                     |                         |
|-------------------------------------------------------------|-------------------------------------|--------------------------|-------------------------------------------------|-------------------------------------|-------------------------|
| 3.3. Social support (emotional)                             | <input checked="" type="checkbox"/> | Able to "nudge" friends  | 13.2 Framing/reframing                          | <input type="checkbox"/>            |                         |
| 4. Shaping knowledge                                        |                                     |                          | 13.3 Incompatible beliefs                       | <input type="checkbox"/>            |                         |
| 4.1 Instruction on how to perform the behavior              | <input type="checkbox"/>            |                          | 13.4 Valued self-identity                       | <input type="checkbox"/>            |                         |
| 4.2 Information about antecedents                           | <input type="checkbox"/>            |                          | 13.5 Identity associated with changed behavior  | <input type="checkbox"/>            |                         |
| 4.3 Re-attribution                                          | <input type="checkbox"/>            |                          | 14. Scheduled consequences                      |                                     |                         |
| 4.4 Behavioral experiments                                  | <input type="checkbox"/>            |                          | 14.1 Behavior cost                              | <input type="checkbox"/>            |                         |
| 5. Natural consequences                                     |                                     |                          | 14.2 Punishment                                 | <input type="checkbox"/>            |                         |
| 5.1 Information about health consequences                   | <input type="checkbox"/>            |                          | 14.3 Remove reward                              | <input checked="" type="checkbox"/> | Loss of activity streak |
| 5.2 Salience of consequences                                | <input type="checkbox"/>            |                          | 14.4 Reward approximation                       | <input type="checkbox"/>            |                         |
| 5.3 Information about social and environmental consequences | <input type="checkbox"/>            |                          | 14.5 Rewarding completion                       | <input checked="" type="checkbox"/> |                         |
| 5.4 Monitoring of emotional consequences                    | <input type="checkbox"/>            |                          | 14.6 Situation-specific reward                  | <input type="checkbox"/>            |                         |
| 5.5 Anticipated regret                                      | <input type="checkbox"/>            |                          | 14.7 Reward incompatible behavior               | <input type="checkbox"/>            |                         |
| 5.6 Information about emotional consequences                | <input type="checkbox"/>            |                          | 14.8 Reward alternative behavior                | <input type="checkbox"/>            |                         |
| 6. Comparison of behavior                                   |                                     |                          | 14.9 Reduce reward frequency                    | <input type="checkbox"/>            |                         |
| 6.1 Demonstration of the behavior                           | <input type="checkbox"/>            |                          | 14.10 Remove punishment                         | <input type="checkbox"/>            |                         |
| 6.2 Social comparison                                       | <input checked="" type="checkbox"/> | friends steps and weight | 15. Self-belief                                 |                                     |                         |
| 6.3 Information about others' approval                      | <input type="checkbox"/>            |                          | 15.1 Verbal persuasion about capability         | <input type="checkbox"/>            |                         |
| 7. Associations                                             |                                     |                          | 15.2 Mental rehearsal of successful performance | <input type="checkbox"/>            |                         |
| 7.1 Prompts/cues                                            | <input checked="" type="checkbox"/> | sedentary alerts         | 15.3 Focus on past success                      | <input checked="" type="checkbox"/> |                         |
| 7.2 Cue signaling reward                                    | <input checked="" type="checkbox"/> |                          | 15.4 Self-talk                                  | <input type="checkbox"/>            |                         |
| 7.3 Reduce prompts/cues                                     | <input type="checkbox"/>            |                          | 16. Covert learning                             | <input type="checkbox"/>            |                         |
| 7.4 Remove access to the reward                             | <input type="checkbox"/>            |                          | 16.1 Imaginary punishment                       | <input type="checkbox"/>            |                         |

**WEARABLE DEVICE:** Amazfit

**Reviewer:** Dr. Koyya, Grace, Maddisor

|                                              |                                     |         |                                             |                                     |                           |
|----------------------------------------------|-------------------------------------|---------|---------------------------------------------|-------------------------------------|---------------------------|
| 7.5 Remove aversive stimulus                 | <input type="checkbox"/>            |         | 16.2 Imaginary reward                       | <input type="checkbox"/>            |                           |
| 7.6 Satiation                                | <input type="checkbox"/>            |         | 16.3 Vicarious consequences                 | <input type="checkbox"/>            |                           |
| 7.7 Exposure                                 | <input type="checkbox"/>            |         | Functionality                               |                                     |                           |
| 7.8 Associative learning                     | <input type="checkbox"/>            |         | Battery lasts <1 day                        | <input type="checkbox"/>            |                           |
| 8 Repetition and substitution                |                                     |         | Battery lasts 1-2 days                      | <input type="checkbox"/>            |                           |
| 8.1 Behavioral practice/rehearsal            | <input type="checkbox"/>            |         | Battery lasts 3-4 days                      | <input type="checkbox"/>            |                           |
| 8.2 Behavior substitution                    | <input type="checkbox"/>            |         | Battery lasts 5-6 days                      | <input checked="" type="checkbox"/> | While wearing it at night |
| 8.3 Habit formation                          | <input checked="" type="checkbox"/> |         | Battery last $\geq 7$ days                  | <input type="checkbox"/>            |                           |
| 8.4 Habit reversal                           | <input type="checkbox"/>            |         | Device pairs with a phone/tablet            | <input checked="" type="checkbox"/> |                           |
| 8.5 Overcorrection                           | <input type="checkbox"/>            |         | Device pairs with a computer                | <input type="checkbox"/>            |                           |
| 8.6 Generalisation of target behavior        | <input type="checkbox"/>            |         | Device syncs with phone/table notifications | <input checked="" type="checkbox"/> |                           |
| 8.7 Graded tasks                             | <input type="checkbox"/>            |         | Device face activity display                | <input checked="" type="checkbox"/> |                           |
| 9. Comparison of outcomes                    |                                     |         | Mobile app activity display                 | <input checked="" type="checkbox"/> |                           |
| 9.1 Credible source                          | <input type="checkbox"/>            |         | Computer activity display                   | <input type="checkbox"/>            |                           |
| 9.2 Pros and cons                            | <input type="checkbox"/>            |         | Wrist worn                                  | <input checked="" type="checkbox"/> |                           |
| 9.3 Comparative imagining of future outcomes | <input type="checkbox"/>            |         | Other wear options                          | <input type="checkbox"/>            |                           |
| 10. Reward and threat                        |                                     |         | Behavior monitoring                         |                                     |                           |
| 10.1 Material incentive (behavior)           | <input type="checkbox"/>            |         | Sleep                                       | <input checked="" type="checkbox"/> |                           |
| 10.2 Material reward (behavior)              | <input type="checkbox"/>            |         | Nutrition                                   | <input checked="" type="checkbox"/> |                           |
| 10.3 Non-specific reward                     | <input checked="" type="checkbox"/> | Streaks | Sedentary                                   | <input type="checkbox"/>            |                           |
| 10.4 Social reward                           | <input checked="" type="checkbox"/> |         | Exercise (workout tracking)                 | <input checked="" type="checkbox"/> | Walking, Running, Cycling |

**Physical activity behaviors tracked:**

|                     |                                     |                         |                                     |                          |                                     |                            |                                     |                             |                                     |
|---------------------|-------------------------------------|-------------------------|-------------------------------------|--------------------------|-------------------------------------|----------------------------|-------------------------------------|-----------------------------|-------------------------------------|
| Steps per Day       | <input checked="" type="checkbox"/> | Minutes per Day (total) | <input checked="" type="checkbox"/> | Exercise minutes per Day | <input checked="" type="checkbox"/> | Energy expenditure (total) | <input checked="" type="checkbox"/> | Exercise energy expenditure | <input checked="" type="checkbox"/> |
| Sitting (idle) time | <input checked="" type="checkbox"/> | Heart rate              | <input checked="" type="checkbox"/> | Other: GPS               | <input checked="" type="checkbox"/> | Other:                     | <input type="checkbox"/>            | Other:                      | <input type="checkbox"/>            |

**WEARABLE DEVICE:** Apple Watch

**Reviewer:** Dr. Koyya

|                                                              | BCT<br>present?                     | Comments                               |                                                                 | BCT<br>present?                     | Comments    |
|--------------------------------------------------------------|-------------------------------------|----------------------------------------|-----------------------------------------------------------------|-------------------------------------|-------------|
| 1. Goals and planning                                        |                                     |                                        | 10.5 Social incentive                                           | <input type="checkbox"/>            |             |
| 1.1 Goal setting (behavior)                                  | <input checked="" type="checkbox"/> | Recommendation but can select own goal | 10.6 Non-specific incentive                                     | <input checked="" type="checkbox"/> |             |
| 1.2 Problem solving                                          | <input type="checkbox"/>            |                                        | 10.7 Self-incentive                                             | <input type="checkbox"/>            |             |
| 1.3 Goal setting (outcome)                                   | <input type="checkbox"/>            |                                        | 10.8 Incentive (outcome)                                        | <input checked="" type="checkbox"/> | Badges      |
| 1.4 Action planning                                          | <input type="checkbox"/>            |                                        | 10.9 Self-reward                                                | <input type="checkbox"/>            |             |
| 1.5 Review behavior goal(s)                                  | <input checked="" type="checkbox"/> |                                        | 10.10 Reward (outcome)                                          | <input type="checkbox"/>            |             |
| 1.6 Discrepancy between<br>current behavior and goal         | <input checked="" type="checkbox"/> |                                        | 10.11 Future punishment                                         | <input checked="" type="checkbox"/> | lose streak |
| 1.7 Review outcome goal(s)                                   | <input type="checkbox"/>            |                                        | 11. Regulation                                                  |                                     |             |
| 1.8 Behavioral contract                                      | <input checked="" type="checkbox"/> | Confirm new goal                       | 11.1 Pharmacological<br>support                                 | <input type="checkbox"/>            |             |
| 1.9 Commitment                                               | <input checked="" type="checkbox"/> |                                        | 11.2 Reduce negative<br>emotions                                | <input type="checkbox"/>            |             |
| 2. Feedback and monitoring                                   |                                     |                                        | 11.3 Conserving mental<br>resources                             | <input type="checkbox"/>            |             |
| 2.1 Monitoring of behavior by<br>others without feedback     | <input type="checkbox"/>            |                                        | 11.4 Paradoxical instructions                                   | <input type="checkbox"/>            |             |
| 2.2 Feedback on behavior                                     | <input checked="" type="checkbox"/> |                                        | 12. Antecedents                                                 |                                     |             |
| 2.3 Self-monitoring of behavior                              | <input checked="" type="checkbox"/> |                                        | 12.1 Restructuring the<br>physical environment                  | <input checked="" type="checkbox"/> |             |
| 2.4 Self-monitoring of<br>outcome(s) of behavior             | <input type="checkbox"/>            |                                        | 12.2 Restructuring the social<br>environment                    | <input type="checkbox"/>            |             |
| 2.5 Monitoring of outcome(s)<br>of behavior without feedback | <input type="checkbox"/>            |                                        | 12.3 Avoidance/reducing<br>exposure to cues for the<br>behavior | <input type="checkbox"/>            |             |
| 2.6 Biofeedback                                              | <input checked="" type="checkbox"/> | heart rate                             | 12.4 Distraction                                                | <input type="checkbox"/>            |             |
| 2.7 Feedback on outcome(s) of<br>behavior                    | <input type="checkbox"/>            |                                        | 12.5 Adding objects to the<br>environment                       | <input checked="" type="checkbox"/> |             |
| 3. Social support                                            |                                     |                                        | 12.6 Body changes                                               | <input type="checkbox"/>            |             |
| 3.1. Social support<br>(unspecified)                         | <input checked="" type="checkbox"/> | leaderboard and competition            | 13. Identity                                                    |                                     |             |
| 3.2. Social support (practical)                              | <input type="checkbox"/>            |                                        | 13.1 Identification of the self<br>as role model                | <input type="checkbox"/>            |             |

**WEARABLE DEVICE:** Apple Watch

**Reviewer:**

Dr. Koyya

|                                                             |                                     |  |                                                 |                                     |                               |
|-------------------------------------------------------------|-------------------------------------|--|-------------------------------------------------|-------------------------------------|-------------------------------|
| 3.3. Social support (emotional)                             | <input type="checkbox"/>            |  | 13.2 Framing/reframing                          | <input type="checkbox"/>            |                               |
| 4. Shaping knowledge                                        |                                     |  | 13.3 Incompatible beliefs                       | <input type="checkbox"/>            |                               |
| 4.1 Instruction on how to perform the behavior              | <input type="checkbox"/>            |  | 13.4 Valued self-identity                       | <input type="checkbox"/>            |                               |
| 4.2 Information about antecedents                           | <input type="checkbox"/>            |  | 13.5 Identity associated with changed behavior  | <input type="checkbox"/>            |                               |
| 4.3 Re-attribution                                          | <input type="checkbox"/>            |  | 14. Scheduled consequences                      |                                     |                               |
| 4.4 Behavioral experiments                                  | <input type="checkbox"/>            |  | 14.1 Behavior cost                              | <input type="checkbox"/>            |                               |
| 5. Natural consequences                                     |                                     |  | 14.2 Punishment                                 | <input type="checkbox"/>            |                               |
| 5.1 Information about health consequences                   | <input type="checkbox"/>            |  | 14.3 Remove reward                              | <input type="checkbox"/>            |                               |
| 5.2 Salience of consequences                                | <input type="checkbox"/>            |  | 14.4 Reward approximation                       | <input type="checkbox"/>            |                               |
| 5.3 Information about social and environmental consequences | <input type="checkbox"/>            |  | 14.5 Rewarding completion                       | <input type="checkbox"/>            |                               |
| 5.4 Monitoring of emotional consequences                    | <input type="checkbox"/>            |  | 14.6 Situation-specific reward                  | <input type="checkbox"/>            |                               |
| 5.5 Anticipated regret                                      | <input type="checkbox"/>            |  | 14.7 Reward incompatible behavior               | <input type="checkbox"/>            |                               |
| 5.6 Information about emotional consequences                | <input type="checkbox"/>            |  | 14.8 Reward alternative behavior                | <input checked="" type="checkbox"/> | Sedentary and workout rewards |
| 6. Comparison of behavior                                   |                                     |  | 14.9 Reduce reward frequency                    | <input type="checkbox"/>            |                               |
| 6.1 Demonstration of the behavior                           | <input type="checkbox"/>            |  | 14.10 Remove punishment                         | <input type="checkbox"/>            |                               |
| 6.2 Social comparison                                       | <input checked="" type="checkbox"/> |  | 15. Self-belief                                 |                                     |                               |
| 6.3 Information about others' approval                      | <input type="checkbox"/>            |  | 15.1 Verbal persuasion about capability         | <input type="checkbox"/>            |                               |
| 7. Associations                                             |                                     |  | 15.2 Mental rehearsal of successful performance | <input type="checkbox"/>            |                               |
| 7.1 Prompts/cues                                            | <input checked="" type="checkbox"/> |  | 15.3 Focus on past success                      | <input checked="" type="checkbox"/> |                               |
| 7.2 Cue signaling reward                                    | <input type="checkbox"/>            |  | 15.4 Self-talk                                  | <input type="checkbox"/>            |                               |
| 7.3 Reduce prompts/cues                                     | <input type="checkbox"/>            |  | 16. Covert learning                             | <input type="checkbox"/>            |                               |
| 7.4 Remove access to the reward                             | <input type="checkbox"/>            |  | 16.1 Imaginary punishment                       | <input type="checkbox"/>            |                               |

**WEARABLE DEVICE:** Apple Watch

**Reviewer:** Dr. Koyya

|                                              |                                     |              |                                             |                                     |             |
|----------------------------------------------|-------------------------------------|--------------|---------------------------------------------|-------------------------------------|-------------|
| 7.5 Remove aversive stimulus                 | <input type="checkbox"/>            |              | 16.2 Imaginary reward                       | <input type="checkbox"/>            |             |
| 7.6 Satiation                                | <input type="checkbox"/>            |              | 16.3 Vicarious consequences                 | <input type="checkbox"/>            |             |
| 7.7 Exposure                                 | <input type="checkbox"/>            |              | Functionality                               |                                     |             |
| 7.8 Associative learning                     | <input type="checkbox"/>            |              | Battery lasts <1 day                        | <input type="checkbox"/>            |             |
| 8 Repetition and substitution                |                                     |              | Battery lasts 1-2 days                      | <input type="checkbox"/>            |             |
| 8.1 Behavioral practice/rehearsal            | <input type="checkbox"/>            |              | Battery lasts 3-4 days                      | <input checked="" type="checkbox"/> |             |
| 8.2 Behavior substitution                    | <input type="checkbox"/>            |              | Battery lasts 5-6 days                      | <input type="checkbox"/>            |             |
| 8.3 Habit formation                          | <input type="checkbox"/>            |              | Battery last $\geq 7$ days                  | <input type="checkbox"/>            |             |
| 8.4 Habit reversal                           | <input type="checkbox"/>            |              | Device pairs with a phone/tablet            | <input checked="" type="checkbox"/> | iPhone only |
| 8.5 Overcorrection                           | <input type="checkbox"/>            |              | Device pairs with a computer                | <input type="checkbox"/>            |             |
| 8.6 Generalisation of target behavior        | <input type="checkbox"/>            |              | Device syncs with phone/table notifications | <input checked="" type="checkbox"/> |             |
| 8.7 Graded tasks                             | <input checked="" type="checkbox"/> | graded goals | Device face activity display                | <input checked="" type="checkbox"/> |             |
| 9. Comparison of outcomes                    |                                     |              | Mobile app activity display                 | <input checked="" type="checkbox"/> |             |
| 9.1 Credible source                          | <input type="checkbox"/>            |              | Computer activity display                   | <input type="checkbox"/>            |             |
| 9.2 Pros and cons                            | <input type="checkbox"/>            |              | Wrist worn                                  | <input checked="" type="checkbox"/> |             |
| 9.3 Comparative imagining of future outcomes | <input type="checkbox"/>            |              | Other wear options                          | <input type="checkbox"/>            |             |
| 10. Reward and threat                        |                                     |              | Behavior monitoring                         |                                     |             |
| 10.1 Material incentive (behavior)           | <input type="checkbox"/>            |              | Sleep                                       | <input type="checkbox"/>            |             |
| 10.2 Material reward (behavior)              | <input type="checkbox"/>            |              | Nutrition                                   | <input type="checkbox"/>            |             |
| 10.3 Non-specific reward                     | <input checked="" type="checkbox"/> |              | Sedentary                                   | <input checked="" type="checkbox"/> |             |
| 10.4 Social reward                           | <input type="checkbox"/>            |              | Exercise (workout tracking)                 | <input checked="" type="checkbox"/> |             |

**Physical activity behaviors tracked:**

|                     |                                     |                         |                                     |                          |                                     |                            |                                     |                             |                                     |
|---------------------|-------------------------------------|-------------------------|-------------------------------------|--------------------------|-------------------------------------|----------------------------|-------------------------------------|-----------------------------|-------------------------------------|
| Steps per Day       | <input checked="" type="checkbox"/> | Minutes per Day (total) | <input type="checkbox"/>            | Exercise minutes per Day | <input checked="" type="checkbox"/> | Energy expenditure (total) | <input checked="" type="checkbox"/> | Exercise energy expenditure | <input checked="" type="checkbox"/> |
| Sitting (idle) time | <input checked="" type="checkbox"/> | Heart rate              | <input checked="" type="checkbox"/> | Other: Distance          | <input checked="" type="checkbox"/> | Other:                     | <input type="checkbox"/>            | Other:                      | <input type="checkbox"/>            |

**WEARABLE DEVICE: Fitbit Charge 3**

Reviewer: Dr. Koyya, Maddison, Grace

|                                                           | BCT present?                        | Comments                                        |                                                           | BCT present?                        | Comments                          |
|-----------------------------------------------------------|-------------------------------------|-------------------------------------------------|-----------------------------------------------------------|-------------------------------------|-----------------------------------|
| 1. Goals and planning                                     |                                     |                                                 | 10.5 Social incentive                                     | <input type="checkbox"/>            |                                   |
| 1.1 Goal setting (behavior)                               | <input checked="" type="checkbox"/> | self-selected, all behavior                     | 10.6 Non-specific incentive                               | <input checked="" type="checkbox"/> | badges/trophies                   |
| 1.2 Problem solving                                       | <input type="checkbox"/>            | feature may be available on Premium upgrade     | 10.7 Self-incentive                                       | <input type="checkbox"/>            |                                   |
| 1.3 Goal setting (outcome)                                | <input checked="" type="checkbox"/> |                                                 | 10.8 Incentive (outcome)                                  | <input checked="" type="checkbox"/> |                                   |
| 1.4 Action planning                                       | <input type="checkbox"/>            |                                                 | 10.9 Self-reward                                          | <input type="checkbox"/>            |                                   |
| 1.5 Review behavior goal(s)                               | <input checked="" type="checkbox"/> |                                                 | 10.10 Reward (outcome)                                    | <input checked="" type="checkbox"/> |                                   |
| 1.6 Discrepancy between current behavior and goal         | <input checked="" type="checkbox"/> |                                                 | 10.11 Future punishment                                   | <input type="checkbox"/>            |                                   |
| 1.7 Review outcome goal(s)                                | <input checked="" type="checkbox"/> |                                                 | 11. Regulation                                            |                                     |                                   |
| 1.8 Behavioral contract                                   | <input checked="" type="checkbox"/> | Agree on selecting a goal                       | 11.1 Pharmacological support                              | <input type="checkbox"/>            |                                   |
| 1.9 Commitment                                            | <input checked="" type="checkbox"/> |                                                 | 11.2 Reduce negative emotions                             | <input type="checkbox"/>            | premium feature                   |
| 2. Feedback and monitoring                                |                                     |                                                 | 11.3 Conserving mental resources                          | <input checked="" type="checkbox"/> | Wellness reports                  |
| 2.1 Monitoring of behavior by others without feedback     | <input type="checkbox"/>            | The watch display allows for constant feedback  | 11.4 Paradoxical instructions                             | <input type="checkbox"/>            |                                   |
| 2.2 Feedback on behavior                                  | <input checked="" type="checkbox"/> |                                                 | 12. Antecedents                                           |                                     |                                   |
| 2.3 Self-monitoring of behavior                           | <input checked="" type="checkbox"/> |                                                 | 12.1 Restructuring the physical environment               | <input checked="" type="checkbox"/> |                                   |
| 2.4 Self-monitoring of outcome(s) of behavior             | <input checked="" type="checkbox"/> |                                                 | 12.2 Restructuring the social environment                 | <input checked="" type="checkbox"/> | Creation of virtual social groups |
| 2.5 Monitoring of outcome(s) of behavior without feedback | <input type="checkbox"/>            |                                                 | 12.3 Avoidance/reducing exposure to cues for the behavior | <input type="checkbox"/>            |                                   |
| 2.6 Biofeedback                                           | <input checked="" type="checkbox"/> | Heart rate                                      | 12.4 Distraction                                          | <input type="checkbox"/>            |                                   |
| 2.7 Feedback on outcome(s) of behavior                    | <input checked="" type="checkbox"/> |                                                 | 12.5 Adding objects to the environment                    | <input checked="" type="checkbox"/> |                                   |
| 3. Social support                                         |                                     |                                                 | 12.6 Body changes                                         | <input type="checkbox"/>            |                                   |
| 3.1. Social support (unspecified)                         | <input checked="" type="checkbox"/> | Large Fitbit groups and personal friends/family | 13. Identity                                              |                                     |                                   |
| 3.2. Social support (practical)                           | <input type="checkbox"/>            |                                                 | 13.1 Identification of the self as role model             | <input type="checkbox"/>            |                                   |

**WEARABLE DEVICE: Fitbit Charge 3**
**Reviewer:**
**Dr. Koyya, Maddison, Grace**

|                                                             |                                     |                                                                           |                                                 |                                     |                         |
|-------------------------------------------------------------|-------------------------------------|---------------------------------------------------------------------------|-------------------------------------------------|-------------------------------------|-------------------------|
| 3.3. Social support (emotional)                             | <input checked="" type="checkbox"/> | cheer/taunt, comments                                                     | 13.2 Framing/reframing                          | <input type="checkbox"/>            |                         |
| 4. Shaping knowledge                                        |                                     |                                                                           | 13.3 Incompatible beliefs                       | <input type="checkbox"/>            |                         |
| 4.1 Instruction on how to perform the behavior              | <input checked="" type="checkbox"/> | Available through program discovery but more options with premium upgrade | 13.4 Valued self-identity                       | <input type="checkbox"/>            |                         |
| 4.2 Information about antecedents                           | <input checked="" type="checkbox"/> | Available through program discovery                                       | 13.5 Identity associated with changed behavior  | <input type="checkbox"/>            |                         |
| 4.3 Re-attribution                                          | <input type="checkbox"/>            |                                                                           | 14. Scheduled consequences                      |                                     |                         |
| 4.4 Behavioral experiments                                  | <input type="checkbox"/>            |                                                                           | 14.1 Behavior cost                              | <input type="checkbox"/>            |                         |
| 5. Natural consequences                                     |                                     |                                                                           | 14.2 Punishment                                 | <input type="checkbox"/>            |                         |
| 5.1 Information about health consequences                   | <input checked="" type="checkbox"/> | Irregular health comments                                                 | 14.3 Remove reward                              | <input checked="" type="checkbox"/> | Loss of activity streak |
| 5.2 Salience of consequences                                | <input type="checkbox"/>            |                                                                           | 14.4 Reward approximation                       | <input checked="" type="checkbox"/> |                         |
| 5.3 Information about social and environmental consequences | <input type="checkbox"/>            |                                                                           | 14.5 Rewarding completion                       | <input checked="" type="checkbox"/> |                         |
| 5.4 Monitoring of emotional consequences                    | <input type="checkbox"/>            |                                                                           | 14.6 Situation-specific reward                  | <input checked="" type="checkbox"/> |                         |
| 5.5 Anticipated regret                                      | <input checked="" type="checkbox"/> |                                                                           | 14.7 Reward incompatible behavior               | <input type="checkbox"/>            |                         |
| 5.6 Information about emotional consequences                | <input checked="" type="checkbox"/> |                                                                           | 14.8 Reward alternative behavior                | <input type="checkbox"/>            |                         |
| 6. Comparison of behavior                                   |                                     |                                                                           | 14.9 Reduce reward frequency                    | <input checked="" type="checkbox"/> |                         |
| 6.1 Demonstration of the behavior                           | <input checked="" type="checkbox"/> | Articles of people who were successful                                    | 14.10 Remove punishment                         | <input type="checkbox"/>            |                         |
| 6.2 Social comparison                                       | <input checked="" type="checkbox"/> | Leaderboard                                                               | 15. Self-belief                                 |                                     |                         |
| 6.3 Information about others' approval                      | <input checked="" type="checkbox"/> |                                                                           | 15.1 Verbal persuasion about capability         | <input type="checkbox"/>            |                         |
| 7. Associations                                             |                                     |                                                                           | 15.2 Mental rehearsal of successful performance | <input type="checkbox"/>            |                         |
| 7.1 Prompts/cues                                            | <input checked="" type="checkbox"/> | sedentary alerts to take steps                                            | 15.3 Focus on past success                      | <input checked="" type="checkbox"/> |                         |
| 7.2 Cue signaling reward                                    | <input checked="" type="checkbox"/> |                                                                           | 15.4 Self-talk                                  | <input type="checkbox"/>            |                         |
| 7.3 Reduce prompts/cues                                     | <input type="checkbox"/>            |                                                                           | 16. Covert learning                             | <input type="checkbox"/>            |                         |
| 7.4 Remove access to the reward                             | <input type="checkbox"/>            |                                                                           | 16.1 Imaginary punishment                       | <input type="checkbox"/>            |                         |



**WEARABLE DEVICE:** Fitbit Charge 3

**Reviewer:** Dr. Koyya, Maddison, Grace

|                                              |                                     |                                 |                                             |                                     |                           |
|----------------------------------------------|-------------------------------------|---------------------------------|---------------------------------------------|-------------------------------------|---------------------------|
| 7.5 Remove aversive stimulus                 | <input type="checkbox"/>            |                                 | 16.2 Imaginary reward                       | <input type="checkbox"/>            |                           |
| 7.6 Satiation                                | <input type="checkbox"/>            |                                 | 16.3 Vicarious consequences                 | <input type="checkbox"/>            |                           |
| 7.7 Exposure                                 | <input type="checkbox"/>            |                                 | Functionality                               |                                     |                           |
| 7.8 Associative learning                     | <input type="checkbox"/>            |                                 | Battery lasts <1 day                        | <input type="checkbox"/>            |                           |
| 8 Repetition and substitution                |                                     |                                 | Battery lasts 1-2 days                      | <input type="checkbox"/>            |                           |
| 8.1 Behavioral practice/rehearsal            | <input type="checkbox"/>            |                                 | Battery lasts 3-4 days                      | <input checked="" type="checkbox"/> |                           |
| 8.2 Behavior substitution                    | <input checked="" type="checkbox"/> | Steps instead of sedentary time | Battery lasts 5-6 days                      | <input type="checkbox"/>            |                           |
| 8.3 Habit formation                          | <input checked="" type="checkbox"/> |                                 | Battery last $\geq 7$ days                  | <input checked="" type="checkbox"/> | While wearing it at night |
| 8.4 Habit reversal                           | <input type="checkbox"/>            |                                 | Device pairs with a phone/tablet            | <input checked="" type="checkbox"/> |                           |
| 8.5 Overcorrection                           | <input type="checkbox"/>            |                                 | Device pairs with a computer                | <input type="checkbox"/>            |                           |
| 8.6 Generalisation of target behavior        | <input type="checkbox"/>            |                                 | Device syncs with phone/table notifications | <input checked="" type="checkbox"/> |                           |
| 8.7 Graded tasks                             | <input checked="" type="checkbox"/> |                                 | Device face activity display                | <input checked="" type="checkbox"/> |                           |
| 9. Comparison of outcomes                    |                                     |                                 | Mobile app activity display                 | <input checked="" type="checkbox"/> |                           |
| 9.1 Credible source                          | <input checked="" type="checkbox"/> | In related blog articles        | Computer activity display                   | <input type="checkbox"/>            |                           |
| 9.2 Pros and cons                            | <input type="checkbox"/>            |                                 | Wrist worn                                  | <input checked="" type="checkbox"/> |                           |
| 9.3 Comparative imagining of future outcomes | <input type="checkbox"/>            |                                 | Other wear options                          | <input type="checkbox"/>            |                           |
| 10. Reward and threat                        |                                     |                                 | Behavior monitoring                         |                                     |                           |
| 10.1 Material incentive (behavior)           | <input type="checkbox"/>            |                                 | Sleep                                       | <input checked="" type="checkbox"/> |                           |
| 10.2 Material reward (behavior)              | <input type="checkbox"/>            |                                 | Nutrition                                   | <input checked="" type="checkbox"/> |                           |
| 10.3 Non-specific reward                     | <input checked="" type="checkbox"/> | Virtual badges/trophies         | Sedentary                                   | <input checked="" type="checkbox"/> |                           |
| 10.4 Social reward                           | <input checked="" type="checkbox"/> | Likes/comments                  | Exercise (workout tracking)                 | <input checked="" type="checkbox"/> | Most exercise types       |

**Physical activity behaviors tracked:**

|                     |                                     |                         |                                     |                          |                                     |                            |                                     |                             |                                     |
|---------------------|-------------------------------------|-------------------------|-------------------------------------|--------------------------|-------------------------------------|----------------------------|-------------------------------------|-----------------------------|-------------------------------------|
| Steps per Day       | <input checked="" type="checkbox"/> | Minutes per Day (total) | <input checked="" type="checkbox"/> | Exercise minutes per Day | <input checked="" type="checkbox"/> | Energy expenditure (total) | <input checked="" type="checkbox"/> | Exercise energy expenditure | <input checked="" type="checkbox"/> |
| Sitting (idle) time | <input checked="" type="checkbox"/> | Heart rate              | <input checked="" type="checkbox"/> | Other: Female health     | <input checked="" type="checkbox"/> | Other: Distance            | <input checked="" type="checkbox"/> | Other: Floors               | <input checked="" type="checkbox"/> |

**WEARABLE DEVICE: Fitbit Ionic (Adidas)**

Reviewer: Dr. Koyya, Maddison, Grace

|                                                              | BCT<br>present?                     | Comments                                        |                                                                 | BCT<br>present?                     | Comments                          |
|--------------------------------------------------------------|-------------------------------------|-------------------------------------------------|-----------------------------------------------------------------|-------------------------------------|-----------------------------------|
| 1. Goals and planning                                        |                                     |                                                 | 10.5 Social incentive                                           | <input type="checkbox"/>            |                                   |
| 1.1 Goal setting (behavior)                                  | <input checked="" type="checkbox"/> | self-selected, all behavior                     | 10.6 Non-specific incentive                                     | <input checked="" type="checkbox"/> | badges/trophies                   |
| 1.2 Problem solving                                          | <input type="checkbox"/>            | feature may be available on Premium upgrade     | 10.7 Self-incentive                                             | <input type="checkbox"/>            |                                   |
| 1.3 Goal setting (outcome)                                   | <input checked="" type="checkbox"/> |                                                 | 10.8 Incentive (outcome)                                        | <input checked="" type="checkbox"/> |                                   |
| 1.4 Action planning                                          | <input type="checkbox"/>            |                                                 | 10.9 Self-reward                                                | <input type="checkbox"/>            |                                   |
| 1.5 Review behavior goal(s)                                  | <input checked="" type="checkbox"/> |                                                 | 10.10 Reward (outcome)                                          | <input checked="" type="checkbox"/> |                                   |
| 1.6 Discrepancy between<br>current behavior and goal         | <input checked="" type="checkbox"/> |                                                 | 10.11 Future punishment                                         | <input type="checkbox"/>            |                                   |
| 1.7 Review outcome goal(s)                                   | <input checked="" type="checkbox"/> |                                                 | 11. Regulation                                                  |                                     |                                   |
| 1.8 Behavioral contract                                      | <input checked="" type="checkbox"/> | Agree on selecting a goal                       | 11.1 Pharmacological<br>support                                 | <input type="checkbox"/>            |                                   |
| 1.9 Commitment                                               | <input checked="" type="checkbox"/> |                                                 | 11.2 Reduce negative<br>emotions                                | <input type="checkbox"/>            | premium feature                   |
| 2. Feedback and monitoring                                   |                                     |                                                 | 11.3 Conserving mental<br>resources                             | <input type="checkbox"/>            |                                   |
| 2.1 Monitoring of behavior by<br>others without feedback     | <input type="checkbox"/>            | the watch display allows for constant feedback  | 11.4 Paradoxical instructions                                   | <input type="checkbox"/>            |                                   |
| 2.2 Feedback on behavior                                     | <input checked="" type="checkbox"/> |                                                 | 12. Antecedents                                                 |                                     |                                   |
| 2.3 Self-monitoring of behavior                              | <input checked="" type="checkbox"/> |                                                 | 12.1 Restructuring the<br>physical environment                  | <input checked="" type="checkbox"/> |                                   |
| 2.4 Self-monitoring of<br>outcome(s) of behavior             | <input checked="" type="checkbox"/> |                                                 | 12.2 Restructuring the social<br>environment                    | <input checked="" type="checkbox"/> | creation of virtual social groups |
| 2.5 Monitoring of outcome(s)<br>of behavior without feedback | <input type="checkbox"/>            |                                                 | 12.3 Avoidance/reducing<br>exposure to cues for the<br>behavior | <input type="checkbox"/>            |                                   |
| 2.6 Biofeedback                                              | <input checked="" type="checkbox"/> | heart rate                                      | 12.4 Distraction                                                | <input type="checkbox"/>            |                                   |
| 2.7 Feedback on outcome(s) of<br>behavior                    | <input checked="" type="checkbox"/> |                                                 | 12.5 Adding objects to the<br>environment                       | <input checked="" type="checkbox"/> |                                   |
| 3. Social support                                            |                                     |                                                 | 12.6 Body changes                                               | <input type="checkbox"/>            |                                   |
| 3.1. Social support<br>(unspecified)                         | <input checked="" type="checkbox"/> | Large fitbit groups and personal friends/family | 13. Identity                                                    |                                     |                                   |
| 3.2. Social support (practical)                              | <input type="checkbox"/>            |                                                 | 13.1 Identification of the self<br>as role model                | <input type="checkbox"/>            |                                   |

**WEARABLE DEVICE: Fitbit Ionic (Adidas)****Reviewer:****Dr. Koyya, Maddison, Grace**

|                                                             |                                     |                                        |                                                 |                                     |                         |
|-------------------------------------------------------------|-------------------------------------|----------------------------------------|-------------------------------------------------|-------------------------------------|-------------------------|
| 3.3. Social support (emotional)                             | <input checked="" type="checkbox"/> | cheer/taunt, comments                  | 13.2 Framing/reframing                          | <input type="checkbox"/>            |                         |
| 4. Shaping knowledge                                        |                                     |                                        | 13.3 Incompatible beliefs                       | <input type="checkbox"/>            |                         |
| 4.1 Instruction on how to perform the behavior              | <input checked="" type="checkbox"/> | Available through program discovery    | 13.4 Valued self-identity                       | <input type="checkbox"/>            |                         |
| 4.2 Information about antecedents                           | <input checked="" type="checkbox"/> | Available through program discovery    | 13.5 Identity associated with changed behavior  | <input type="checkbox"/>            |                         |
| 4.3 Re-attribution                                          | <input type="checkbox"/>            |                                        | 14. Scheduled consequences                      |                                     |                         |
| 4.4 Behavioral experiments                                  | <input type="checkbox"/>            |                                        | 14.1 Behavior cost                              | <input type="checkbox"/>            |                         |
| 5. Natural consequences                                     |                                     |                                        | 14.2 Punishment                                 | <input type="checkbox"/>            |                         |
| 5.1 Information about health consequences                   | <input checked="" type="checkbox"/> | irregular health comments              | 14.3 Remove reward                              | <input checked="" type="checkbox"/> | Loss of activity streak |
| 5.2 Salience of consequences                                | <input type="checkbox"/>            |                                        | 14.4 Reward approximation                       | <input checked="" type="checkbox"/> |                         |
| 5.3 Information about social and environmental consequences | <input type="checkbox"/>            |                                        | 14.5 Rewarding completion                       | <input checked="" type="checkbox"/> |                         |
| 5.4 Monitoring of emotional consequences                    | <input type="checkbox"/>            |                                        | 14.6 Situation-specific reward                  | <input checked="" type="checkbox"/> |                         |
| 5.5 Anticipated regret                                      | <input checked="" type="checkbox"/> |                                        | 14.7 Reward incompatible behavior               | <input type="checkbox"/>            |                         |
| 5.6 Information about emotional consequences                | <input checked="" type="checkbox"/> |                                        | 14.8 Reward alternative behavior                | <input checked="" type="checkbox"/> |                         |
| 6. Comparison of behavior                                   |                                     |                                        | 14.9 Reduce reward frequency                    | <input type="checkbox"/>            |                         |
| 6.1 Demonstration of the behavior                           | <input checked="" type="checkbox"/> | Articles of people who were successful | 14.10 Remove punishment                         | <input type="checkbox"/>            |                         |
| 6.2 Social comparison                                       | <input checked="" type="checkbox"/> | Leaderboard                            | 15. Self-belief                                 |                                     |                         |
| 6.3 Information about others' approval                      | <input checked="" type="checkbox"/> |                                        | 15.1 Verbal persuasion about capability         | <input type="checkbox"/>            |                         |
| 7. Associations                                             |                                     |                                        | 15.2 Mental rehearsal of successful performance | <input type="checkbox"/>            |                         |
| 7.1 Prompts/cues                                            | <input checked="" type="checkbox"/> | sedentary alerts to take steps         | 15.3 Focus on past success                      | <input checked="" type="checkbox"/> |                         |
| 7.2 Cue signaling reward                                    | <input checked="" type="checkbox"/> |                                        | 15.4 Self-talk                                  | <input type="checkbox"/>            |                         |
| 7.3 Reduce prompts/cues                                     | <input type="checkbox"/>            |                                        | 16. Covert learning                             | <input type="checkbox"/>            |                         |
| 7.4 Remove access to the reward                             | <input type="checkbox"/>            |                                        | 16.1 Imaginary punishment                       | <input type="checkbox"/>            |                         |

**WEARABLE DEVICE:** Fitbit Ionic (Adidas)

**Reviewer:** Dr. Koyya, Maddison, Grace

|                                              |                                     |                                 |                                             |                                     |                           |
|----------------------------------------------|-------------------------------------|---------------------------------|---------------------------------------------|-------------------------------------|---------------------------|
| 7.5 Remove aversive stimulus                 | <input type="checkbox"/>            |                                 | 16.2 Imaginary reward                       | <input type="checkbox"/>            |                           |
| 7.6 Satiation                                | <input type="checkbox"/>            |                                 | 16.3 Vicarious consequences                 | <input type="checkbox"/>            |                           |
| 7.7 Exposure                                 | <input type="checkbox"/>            |                                 | Functionality                               |                                     |                           |
| 7.8 Associative learning                     | <input type="checkbox"/>            |                                 | Battery lasts <1 day                        | <input type="checkbox"/>            |                           |
| 8 Repetition and substitution                |                                     |                                 | Battery lasts 1-2 days                      | <input type="checkbox"/>            |                           |
| 8.1 Behavioral practice/rehearsal            | <input type="checkbox"/>            | Premium feature                 | Battery lasts 3-4 days                      | <input type="checkbox"/>            |                           |
| 8.2 Behavior substitution                    | <input checked="" type="checkbox"/> | steps instead of sedentary time | Battery lasts 5-6 days                      | <input checked="" type="checkbox"/> |                           |
| 8.3 Habit formation                          | <input checked="" type="checkbox"/> |                                 | Battery last $\geq 7$ days                  | <input checked="" type="checkbox"/> | While wearing it to sleep |
| 8.4 Habit reversal                           | <input type="checkbox"/>            |                                 | Device pairs with a phone/tablet            | <input checked="" type="checkbox"/> |                           |
| 8.5 Overcorrection                           | <input type="checkbox"/>            |                                 | Device pairs with a computer                | <input type="checkbox"/>            |                           |
| 8.6 Generalisation of target behavior        | <input type="checkbox"/>            |                                 | Device syncs with phone/table notifications | <input checked="" type="checkbox"/> |                           |
| 8.7 Graded tasks                             | <input checked="" type="checkbox"/> |                                 | Device face activity display                | <input checked="" type="checkbox"/> |                           |
| 9. Comparison of outcomes                    |                                     |                                 | Mobile app activity display                 | <input checked="" type="checkbox"/> |                           |
| 9.1 Credible source                          | <input checked="" type="checkbox"/> | In related blog articles        | Computer activity display                   | <input type="checkbox"/>            |                           |
| 9.2 Pros and cons                            | <input type="checkbox"/>            |                                 | Wrist worn                                  | <input checked="" type="checkbox"/> |                           |
| 9.3 Comparative imagining of future outcomes | <input type="checkbox"/>            |                                 | Other wear options                          | <input type="checkbox"/>            |                           |
| 10. Reward and threat                        |                                     |                                 | Behavior monitoring                         |                                     |                           |
| 10.1 Material incentive (behavior)           | <input type="checkbox"/>            |                                 | Sleep                                       | <input checked="" type="checkbox"/> |                           |
| 10.2 Material reward (behavior)              | <input type="checkbox"/>            |                                 | Nutrition                                   | <input checked="" type="checkbox"/> |                           |
| 10.3 Non-specific reward                     | <input checked="" type="checkbox"/> | Virtual badges/trophies         | Sedentary                                   | <input checked="" type="checkbox"/> |                           |
| 10.4 Social reward                           | <input checked="" type="checkbox"/> | Likes/comments                  | Exercise (workout tracking)                 | <input checked="" type="checkbox"/> | Most exercise types       |

**Physical activity behaviors tracked:**

|                     |                                     |                         |                                     |                          |                                     |                            |                                     |                             |                                     |
|---------------------|-------------------------------------|-------------------------|-------------------------------------|--------------------------|-------------------------------------|----------------------------|-------------------------------------|-----------------------------|-------------------------------------|
| Steps per Day       | <input checked="" type="checkbox"/> | Minutes per Day (total) | <input type="checkbox"/>            | Exercise minutes per Day | <input checked="" type="checkbox"/> | Energy expenditure (total) | <input checked="" type="checkbox"/> | Exercise energy expenditure | <input checked="" type="checkbox"/> |
| Sitting (idle) time | <input checked="" type="checkbox"/> | Heart rate              | <input checked="" type="checkbox"/> | Other: Female health     | <input checked="" type="checkbox"/> | Other: Distance            | <input checked="" type="checkbox"/> | Other: Floors               | <input checked="" type="checkbox"/> |

**WEARABLE DEVICE: Fitbit Versa 2**

Reviewer: Dr. Koyya, Grace, Maddison

|                                                           | BCT present?                        | Comments                                        |                                                           | BCT present?                        | Comments                                |
|-----------------------------------------------------------|-------------------------------------|-------------------------------------------------|-----------------------------------------------------------|-------------------------------------|-----------------------------------------|
| 1. Goals and planning                                     |                                     |                                                 | 10.5 Social incentive                                     | <input type="checkbox"/>            |                                         |
| 1.1 Goal setting (behavior)                               | <input checked="" type="checkbox"/> | self-selected, all behavior                     | 10.6 Non-specific incentive                               | <input checked="" type="checkbox"/> | badges/trophies                         |
| 1.2 Problem solving                                       | <input type="checkbox"/>            | Feature may be available on premium upgrade     | 10.7 Self-incentive                                       | <input type="checkbox"/>            |                                         |
| 1.3 Goal setting (outcome)                                | <input checked="" type="checkbox"/> |                                                 | 10.8 Incentive (outcome)                                  | <input checked="" type="checkbox"/> |                                         |
| 1.4 Action planning                                       | <input type="checkbox"/>            |                                                 | 10.9 Self-reward                                          | <input type="checkbox"/>            |                                         |
| 1.5 Review behavior goal(s)                               | <input checked="" type="checkbox"/> |                                                 | 10.10 Reward (outcome)                                    | <input checked="" type="checkbox"/> |                                         |
| 1.6 Discrepancy between current behavior and goal         | <input checked="" type="checkbox"/> |                                                 | 10.11 Future punishment                                   | <input type="checkbox"/>            |                                         |
| 1.7 Review outcome goal(s)                                | <input checked="" type="checkbox"/> |                                                 | 11. Regulation                                            |                                     |                                         |
| 1.8 Behavioral contract                                   | <input checked="" type="checkbox"/> | Agree on selecting goal                         | 11.1 Pharmacological support                              | <input type="checkbox"/>            |                                         |
| 1.9 Commitment                                            | <input checked="" type="checkbox"/> |                                                 | 11.2 Reduce negative emotions                             | <input type="checkbox"/>            | premium feature                         |
| 2. Feedback and monitoring                                |                                     |                                                 | 11.3 Conserving mental resources                          | <input checked="" type="checkbox"/> | Intro to healthy habits guided programs |
| 2.1 Monitoring of behavior by others without feedback     | <input type="checkbox"/>            | the watch allows for constant feedback          | 11.4 Paradoxical instructions                             | <input type="checkbox"/>            |                                         |
| 2.2 Feedback on behavior                                  | <input checked="" type="checkbox"/> |                                                 | 12. Antecedents                                           |                                     |                                         |
| 2.3 Self-monitoring of behavior                           | <input checked="" type="checkbox"/> |                                                 | 12.1 Restructuring the physical environment               | <input checked="" type="checkbox"/> |                                         |
| 2.4 Self-monitoring of outcome(s) of behavior             | <input checked="" type="checkbox"/> |                                                 | 12.2 Restructuring the social environment                 | <input checked="" type="checkbox"/> | Creation of virtual social groups       |
| 2.5 Monitoring of outcome(s) of behavior without feedback | <input type="checkbox"/>            |                                                 | 12.3 Avoidance/reducing exposure to cues for the behavior | <input type="checkbox"/>            |                                         |
| 2.6 Biofeedback                                           | <input checked="" type="checkbox"/> | heart rate                                      | 12.4 Distraction                                          | <input type="checkbox"/>            |                                         |
| 2.7 Feedback on outcome(s) of behavior                    | <input checked="" type="checkbox"/> |                                                 | 12.5 Adding objects to the environment                    | <input checked="" type="checkbox"/> |                                         |
| 3. Social support                                         |                                     |                                                 | 12.6 Body changes                                         | <input type="checkbox"/>            |                                         |
| 3.1. Social support (unspecified)                         | <input checked="" type="checkbox"/> | Large Fitbit groups and personal friends/family | 13. Identity                                              |                                     |                                         |
| 3.2. Social support (practical)                           | <input type="checkbox"/>            |                                                 | 13.1 Identification of the self as role model             | <input type="checkbox"/>            |                                         |

**WEARABLE DEVICE: Fitbit Versa 2**

**Reviewer:**

**Dr. Koyya, Grace, Maddison**

|                                                             |                                     |                                        |                                                 |                                     |                         |
|-------------------------------------------------------------|-------------------------------------|----------------------------------------|-------------------------------------------------|-------------------------------------|-------------------------|
| 3.3. Social support (emotional)                             | <input checked="" type="checkbox"/> |                                        | 13.2 Framing/reframing                          | <input type="checkbox"/>            |                         |
| 4. Shaping knowledge                                        |                                     |                                        | 13.3 Incompatible beliefs                       | <input type="checkbox"/>            |                         |
| 4.1 Instruction on how to perform the behavior              | <input checked="" type="checkbox"/> |                                        | 13.4 Valued self-identity                       | <input type="checkbox"/>            |                         |
| 4.2 Information about antecedents                           | <input checked="" type="checkbox"/> |                                        | 13.5 Identity associated with changed behavior  | <input type="checkbox"/>            |                         |
| 4.3 Re-attribution                                          | <input type="checkbox"/>            |                                        | 14. Scheduled consequences                      |                                     |                         |
| 4.4 Behavioral experiments                                  | <input type="checkbox"/>            |                                        | 14.1 Behavior cost                              | <input type="checkbox"/>            |                         |
| 5. Natural consequences                                     |                                     |                                        | 14.2 Punishment                                 | <input type="checkbox"/>            |                         |
| 5.1 Information about health consequences                   | <input checked="" type="checkbox"/> |                                        | 14.3 Remove reward                              | <input checked="" type="checkbox"/> | Loss of activity streak |
| 5.2 Salience of consequences                                | <input type="checkbox"/>            |                                        | 14.4 Reward approximation                       | <input checked="" type="checkbox"/> |                         |
| 5.3 Information about social and environmental consequences | <input type="checkbox"/>            |                                        | 14.5 Rewarding completion                       | <input checked="" type="checkbox"/> |                         |
| 5.4 Monitoring of emotional consequences                    | <input type="checkbox"/>            |                                        | 14.6 Situation-specific reward                  | <input checked="" type="checkbox"/> |                         |
| 5.5 Anticipated regret                                      | <input checked="" type="checkbox"/> |                                        | 14.7 Reward incompatible behavior               | <input type="checkbox"/>            |                         |
| 5.6 Information about emotional consequences                | <input checked="" type="checkbox"/> |                                        | 14.8 Reward alternative behavior                | <input type="checkbox"/>            |                         |
| 6. Comparison of behavior                                   |                                     |                                        | 14.9 Reduce reward frequency                    | <input checked="" type="checkbox"/> |                         |
| 6.1 Demonstration of the behavior                           | <input checked="" type="checkbox"/> | Articles of people who were successful | 14.10 Remove punishment                         | <input type="checkbox"/>            |                         |
| 6.2 Social comparison                                       | <input checked="" type="checkbox"/> |                                        | 15. Self-belief                                 |                                     |                         |
| 6.3 Information about others' approval                      | <input checked="" type="checkbox"/> |                                        | 15.1 Verbal persuasion about capability         | <input type="checkbox"/>            |                         |
| 7. Associations                                             |                                     |                                        | 15.2 Mental rehearsal of successful performance | <input type="checkbox"/>            |                         |
| 7.1 Prompts/cues                                            | <input checked="" type="checkbox"/> |                                        | 15.3 Focus on past success                      | <input checked="" type="checkbox"/> |                         |
| 7.2 Cue signaling reward                                    | <input checked="" type="checkbox"/> |                                        | 15.4 Self-talk                                  | <input type="checkbox"/>            |                         |
| 7.3 Reduce prompts/cues                                     | <input type="checkbox"/>            |                                        | 16. Covert learning                             | <input type="checkbox"/>            |                         |
| 7.4 Remove access to the reward                             | <input type="checkbox"/>            |                                        | 16.1 Imaginary punishment                       | <input type="checkbox"/>            |                         |

**WEARABLE DEVICE:** Fitbit Versa 2

**Reviewer:** Dr. Koyya, Grace, Maddisor

|                                              |                                     |                                 |                                             |                                     |                           |
|----------------------------------------------|-------------------------------------|---------------------------------|---------------------------------------------|-------------------------------------|---------------------------|
| 7.5 Remove aversive stimulus                 | <input type="checkbox"/>            |                                 | 16.2 Imaginary reward                       | <input type="checkbox"/>            |                           |
| 7.6 Satiation                                | <input type="checkbox"/>            |                                 | 16.3 Vicarious consequences                 | <input type="checkbox"/>            |                           |
| 7.7 Exposure                                 | <input type="checkbox"/>            |                                 | Functionality                               |                                     |                           |
| 7.8 Associative learning                     | <input type="checkbox"/>            |                                 | Battery lasts <1 day                        | <input type="checkbox"/>            |                           |
| 8 Repetition and substitution                |                                     |                                 | Battery lasts 1-2 days                      | <input type="checkbox"/>            |                           |
| 8.1 Behavioral practice/rehearsal            | <input type="checkbox"/>            |                                 | Battery lasts 3-4 days                      | <input type="checkbox"/>            |                           |
| 8.2 Behavior substitution                    | <input checked="" type="checkbox"/> | Steps instead of sedentary time | Battery lasts 5-6 days                      | <input checked="" type="checkbox"/> |                           |
| 8.3 Habit formation                          | <input checked="" type="checkbox"/> |                                 | Battery last $\geq 7$ days                  | <input checked="" type="checkbox"/> | While wearing it at night |
| 8.4 Habit reversal                           | <input type="checkbox"/>            |                                 | Device pairs with a phone/tablet            | <input checked="" type="checkbox"/> |                           |
| 8.5 Overcorrection                           | <input type="checkbox"/>            |                                 | Device pairs with a computer                | <input type="checkbox"/>            |                           |
| 8.6 Generalisation of target behavior        | <input type="checkbox"/>            |                                 | Device syncs with phone/table notifications | <input checked="" type="checkbox"/> |                           |
| 8.7 Graded tasks                             | <input checked="" type="checkbox"/> |                                 | Device face activity display                | <input checked="" type="checkbox"/> |                           |
| 9. Comparison of outcomes                    |                                     |                                 | Mobile app activity display                 | <input checked="" type="checkbox"/> |                           |
| 9.1 Credible source                          | <input checked="" type="checkbox"/> |                                 | Computer activity display                   | <input type="checkbox"/>            |                           |
| 9.2 Pros and cons                            | <input type="checkbox"/>            |                                 | Wrist worn                                  | <input checked="" type="checkbox"/> |                           |
| 9.3 Comparative imagining of future outcomes | <input type="checkbox"/>            |                                 | Other wear options                          | <input type="checkbox"/>            |                           |
| 10. Reward and threat                        |                                     |                                 | Behavior monitoring                         |                                     |                           |
| 10.1 Material incentive (behavior)           | <input type="checkbox"/>            |                                 | Sleep                                       | <input checked="" type="checkbox"/> |                           |
| 10.2 Material reward (behavior)              | <input type="checkbox"/>            |                                 | Nutrition                                   | <input checked="" type="checkbox"/> |                           |
| 10.3 Non-specific reward                     | <input checked="" type="checkbox"/> |                                 | Sedentary                                   | <input checked="" type="checkbox"/> |                           |
| 10.4 Social reward                           | <input checked="" type="checkbox"/> |                                 | Exercise (workout tracking)                 | <input checked="" type="checkbox"/> | Most exercise types       |

**Physical activity behaviors tracked:**

|                     |                                     |                         |                                     |                          |                                     |                            |                                     |                             |                                     |
|---------------------|-------------------------------------|-------------------------|-------------------------------------|--------------------------|-------------------------------------|----------------------------|-------------------------------------|-----------------------------|-------------------------------------|
| Steps per Day       | <input checked="" type="checkbox"/> | Minutes per Day (total) | <input checked="" type="checkbox"/> | Exercise minutes per Day | <input checked="" type="checkbox"/> | Energy expenditure (total) | <input checked="" type="checkbox"/> | Exercise energy expenditure | <input checked="" type="checkbox"/> |
| Sitting (idle) time | <input checked="" type="checkbox"/> | Heart rate              | <input checked="" type="checkbox"/> | Other: Female health     | <input checked="" type="checkbox"/> | Other: Distance            | <input checked="" type="checkbox"/> | Other: Floors               | <input checked="" type="checkbox"/> |

**WEARABLE DEVICE:** Samsung galaxy watch

**Reviewer:** Dr. Koyya, Maddison, Grace

|                                                              | BCT<br>present?                     | Comments                                 |                                                                 | BCT<br>present?                     | Comments                |
|--------------------------------------------------------------|-------------------------------------|------------------------------------------|-----------------------------------------------------------------|-------------------------------------|-------------------------|
| 1. Goals and planning                                        |                                     |                                          | 10.5 Social incentive                                           | <input checked="" type="checkbox"/> | With other Samsung apps |
| 1.1 Goal setting (behavior)                                  | <input checked="" type="checkbox"/> | custom calorie burn, minutes, move hours | 10.6 Non-specific incentive                                     | <input type="checkbox"/>            |                         |
| 1.2 Problem solving                                          | <input type="checkbox"/>            |                                          | 10.7 Self-incentive                                             | <input type="checkbox"/>            |                         |
| 1.3 Goal setting (outcome)                                   | <input checked="" type="checkbox"/> |                                          | 10.8 Incentive (outcome)                                        | <input type="checkbox"/>            |                         |
| 1.4 Action planning                                          | <input type="checkbox"/>            |                                          | 10.9 Self-reward                                                | <input checked="" type="checkbox"/> |                         |
| 1.5 Review behavior goal(s)                                  | <input checked="" type="checkbox"/> | Weekly review                            | 10.10 Reward (outcome)                                          | <input type="checkbox"/>            |                         |
| 1.6 Discrepancy between<br>current behavior and goal         | <input checked="" type="checkbox"/> |                                          | 10.11 Future punishment                                         | <input type="checkbox"/>            |                         |
| 1.7 Review outcome goal(s)                                   | <input checked="" type="checkbox"/> |                                          | 11. Regulation                                                  |                                     |                         |
| 1.8 Behavioral contract                                      | <input checked="" type="checkbox"/> |                                          | 11.1 Pharmacological<br>support                                 | <input type="checkbox"/>            |                         |
| 1.9 Commitment                                               | <input checked="" type="checkbox"/> |                                          | 11.2 Reduce negative<br>emotions                                | <input type="checkbox"/>            |                         |
| 2. Feedback and monitoring                                   |                                     |                                          | 11.3 Conserving mental<br>resources                             | <input type="checkbox"/>            |                         |
| 2.1 Monitoring of behavior by<br>others without feedback     | <input type="checkbox"/>            |                                          | 11.4 Paradoxical instructions                                   | <input type="checkbox"/>            |                         |
| 2.2 Feedback on behavior                                     | <input checked="" type="checkbox"/> |                                          | 12. Antecedents                                                 |                                     |                         |
| 2.3 Self-monitoring of behavior                              | <input checked="" type="checkbox"/> |                                          | 12.1 Restructuring the<br>physical environment                  | <input checked="" type="checkbox"/> |                         |
| 2.4 Self-monitoring of<br>outcome(s) of behavior             | <input type="checkbox"/>            |                                          | 12.2 Restructuring the social<br>environment                    | <input type="checkbox"/>            |                         |
| 2.5 Monitoring of outcome(s)<br>of behavior without feedback | <input type="checkbox"/>            |                                          | 12.3 Avoidance/reducing<br>exposure to cues for the<br>behavior | <input type="checkbox"/>            |                         |
| 2.6 Biofeedback                                              | <input checked="" type="checkbox"/> | heart rate                               | 12.4 Distraction                                                | <input type="checkbox"/>            |                         |
| 2.7 Feedback on outcome(s) of<br>behavior                    | <input type="checkbox"/>            |                                          | 12.5 Adding objects to the<br>environment                       | <input checked="" type="checkbox"/> |                         |
| 3. Social support                                            |                                     |                                          | 12.6 Body changes                                               | <input type="checkbox"/>            |                         |
| 3.1. Social support<br>(unspecified)                         | <input checked="" type="checkbox"/> |                                          | 13. Identity                                                    |                                     |                         |
| 3.2. Social support (practical)                              | <input type="checkbox"/>            |                                          | 13.1 Identification of the self<br>as role model                | <input type="checkbox"/>            |                         |



**WEARABLE DEVICE:** Samsung galaxy watch

**Reviewer:**

Dr. Koyya, Maddison, Grace

|                                                             |                                     |                  |                                                 |                                     |                                            |
|-------------------------------------------------------------|-------------------------------------|------------------|-------------------------------------------------|-------------------------------------|--------------------------------------------|
| 3.3. Social support (emotional)                             | <input type="checkbox"/>            |                  | 13.2 Framing/reframing                          | <input type="checkbox"/>            |                                            |
| 4. Shaping knowledge                                        |                                     |                  | 13.3 Incompatible beliefs                       | <input type="checkbox"/>            |                                            |
| 4.1 Instruction on how to perform the behavior              | <input checked="" type="checkbox"/> |                  | 13.4 Valued self-identity                       | <input type="checkbox"/>            |                                            |
| 4.2 Information about antecedents                           | <input type="checkbox"/>            |                  | 13.5 Identity associated with changed behavior  | <input type="checkbox"/>            |                                            |
| 4.3 Re-attribution                                          | <input type="checkbox"/>            |                  | 14. Scheduled consequences                      |                                     |                                            |
| 4.4 Behavioral experiments                                  | <input type="checkbox"/>            |                  | 14.1 Behavior cost                              | <input type="checkbox"/>            |                                            |
| 5. Natural consequences                                     |                                     |                  | 14.2 Punishment                                 | <input type="checkbox"/>            |                                            |
| 5.1 Information about health consequences                   | <input type="checkbox"/>            |                  | 14.3 Remove reward                              | <input type="checkbox"/>            |                                            |
| 5.2 Salience of consequences                                | <input type="checkbox"/>            |                  | 14.4 Reward approximation                       | <input type="checkbox"/>            |                                            |
| 5.3 Information about social and environmental consequences | <input type="checkbox"/>            |                  | 14.5 Rewarding completion                       | <input type="checkbox"/>            |                                            |
| 5.4 Monitoring of emotional consequences                    | <input type="checkbox"/>            |                  | 14.6 Situation-specific reward                  | <input type="checkbox"/>            |                                            |
| 5.5 Anticipated regret                                      | <input type="checkbox"/>            |                  | 14.7 Reward incompatible behavior               | <input type="checkbox"/>            |                                            |
| 5.6 Information about emotional consequences                | <input type="checkbox"/>            |                  | 14.8 Reward alternative behavior                | <input type="checkbox"/>            |                                            |
| 6. Comparison of behavior                                   |                                     |                  | 14.9 Reduce reward frequency                    | <input type="checkbox"/>            |                                            |
| 6.1 Demonstration of the behavior                           | <input type="checkbox"/>            |                  | 14.10 Remove punishment                         | <input type="checkbox"/>            |                                            |
| 6.2 Social comparison                                       | <input checked="" type="checkbox"/> |                  | 15. Self-belief                                 |                                     |                                            |
| 6.3 Information about others' approval                      | <input type="checkbox"/>            |                  | 15.1 Verbal persuasion about capability         | <input type="checkbox"/>            |                                            |
| 7. Associations                                             |                                     |                  | 15.2 Mental rehearsal of successful performance | <input type="checkbox"/>            |                                            |
| 7.1 Prompts/cues                                            | <input checked="" type="checkbox"/> | Sedentary alerts | 15.3 Focus on past success                      | <input checked="" type="checkbox"/> | Comparison of current and past performance |
| 7.2 Cue signaling reward                                    | <input type="checkbox"/>            |                  | 15.4 Self-talk                                  | <input type="checkbox"/>            |                                            |
| 7.3 Reduce prompts/cues                                     | <input type="checkbox"/>            |                  | 16. Covert learning                             | <input type="checkbox"/>            |                                            |
| 7.4 Remove access to the reward                             | <input type="checkbox"/>            |                  | 16.1 Imaginary punishment                       | <input type="checkbox"/>            |                                            |

**WEARABLE DEVICE:** Samsung galaxy watch

**Reviewer:** Dr. Koyya, Maddison, Grace

|                                              |                                     |                                 |                                             |                                     |                             |
|----------------------------------------------|-------------------------------------|---------------------------------|---------------------------------------------|-------------------------------------|-----------------------------|
| 7.5 Remove aversive stimulus                 | <input type="checkbox"/>            |                                 | 16.2 Imaginary reward                       | <input type="checkbox"/>            |                             |
| 7.6 Satiation                                | <input type="checkbox"/>            |                                 | 16.3 Vicarious consequences                 | <input type="checkbox"/>            |                             |
| 7.7 Exposure                                 | <input type="checkbox"/>            |                                 | Functionality                               |                                     |                             |
| 7.8 Associative learning                     | <input type="checkbox"/>            |                                 | Battery lasts <1 day                        | <input type="checkbox"/>            |                             |
| 8 Repetition and substitution                |                                     |                                 | Battery lasts 1-2 days                      | <input checked="" type="checkbox"/> | When using "Wifi always on" |
| 8.1 Behavioral practice/rehearsal            | <input checked="" type="checkbox"/> |                                 | Battery lasts 3-4 days                      | <input checked="" type="checkbox"/> | Without "wifi always on"    |
| 8.2 Behavior substitution                    | <input checked="" type="checkbox"/> | Activity for sedentary behavior | Battery lasts 5-6 days                      | <input type="checkbox"/>            |                             |
| 8.3 Habit formation                          | <input checked="" type="checkbox"/> |                                 | Battery last $\geq 7$ days                  | <input type="checkbox"/>            |                             |
| 8.4 Habit reversal                           | <input type="checkbox"/>            |                                 | Device pairs with a phone/tablet            | <input checked="" type="checkbox"/> | Android phone only          |
| 8.5 Overcorrection                           | <input type="checkbox"/>            |                                 | Device pairs with a computer                | <input type="checkbox"/>            |                             |
| 8.6 Generalisation of target behavior        | <input type="checkbox"/>            |                                 | Device syncs with phone/table notifications | <input checked="" type="checkbox"/> | Galaxy user                 |
| 8.7 Graded tasks                             | <input type="checkbox"/>            |                                 | Device face activity display                | <input checked="" type="checkbox"/> | iPhone user                 |
| 9. Comparison of outcomes                    |                                     |                                 | Mobile app activity display                 | <input type="checkbox"/>            |                             |
| 9.1 Credible source                          | <input type="checkbox"/>            |                                 | Computer activity display                   | <input type="checkbox"/>            |                             |
| 9.2 Pros and cons                            | <input type="checkbox"/>            |                                 | Wrist worn                                  | <input checked="" type="checkbox"/> |                             |
| 9.3 Comparative imagining of future outcomes | <input type="checkbox"/>            |                                 | Other wear options                          | <input type="checkbox"/>            |                             |
| 10. Reward and threat                        |                                     |                                 | Behavior monitoring                         |                                     |                             |
| 10.1 Material incentive (behavior)           | <input type="checkbox"/>            |                                 | Sleep                                       | <input checked="" type="checkbox"/> |                             |
| 10.2 Material reward (behavior)              | <input type="checkbox"/>            |                                 | Nutrition                                   | <input checked="" type="checkbox"/> |                             |
| 10.3 Non-specific reward                     | <input checked="" type="checkbox"/> |                                 | Sedentary                                   | <input checked="" type="checkbox"/> |                             |
| 10.4 Social reward                           | <input type="checkbox"/>            |                                 | Exercise (workout tracking)                 | <input checked="" type="checkbox"/> |                             |

**Physical activity behaviors tracked:**

|                     |                                     |                         |                                     |                          |                                     |                            |                          |                             |                                     |
|---------------------|-------------------------------------|-------------------------|-------------------------------------|--------------------------|-------------------------------------|----------------------------|--------------------------|-----------------------------|-------------------------------------|
| Steps per Day       | <input checked="" type="checkbox"/> | Minutes per Day (total) | <input type="checkbox"/>            | Exercise minutes per Day | <input checked="" type="checkbox"/> | Energy expenditure (total) | <input type="checkbox"/> | Exercise energy expenditure | <input checked="" type="checkbox"/> |
| Sitting (idle) time | <input checked="" type="checkbox"/> | Heart rate              | <input checked="" type="checkbox"/> | Other: <b>Stress</b>     | <input checked="" type="checkbox"/> | Other:                     | <input type="checkbox"/> | Other:                      | <input type="checkbox"/>            |

**WEARABLE DEVICE:** Vivomove HR

**Reviewer:** Dr. Koyya, Maddison

|                                                              | BCT<br>present?                     | Comments                  |                                                                 | BCT<br>present?                     | Comments            |
|--------------------------------------------------------------|-------------------------------------|---------------------------|-----------------------------------------------------------------|-------------------------------------|---------------------|
| 1. Goals and planning                                        |                                     |                           | 10.5 Social incentive                                           | <input type="checkbox"/>            |                     |
| 1.1 Goal setting (behavior)                                  | <input checked="" type="checkbox"/> | Auto or custom            | 10.6 Non-specific incentive                                     | <input checked="" type="checkbox"/> |                     |
| 1.2 Problem solving                                          | <input type="checkbox"/>            |                           | 10.7 Self-incentive                                             | <input type="checkbox"/>            |                     |
| 1.3 Goal setting (outcome)                                   | <input checked="" type="checkbox"/> |                           | 10.8 Incentive (outcome)                                        | <input type="checkbox"/>            |                     |
| 1.4 Action planning                                          | <input type="checkbox"/>            |                           | 10.9 Self-reward                                                | <input type="checkbox"/>            |                     |
| 1.5 Review behavior goal(s)                                  | <input checked="" type="checkbox"/> |                           | 10.10 Reward (outcome)                                          | <input checked="" type="checkbox"/> |                     |
| 1.6 Discrepancy between<br>current behavior and goal         | <input checked="" type="checkbox"/> |                           | 10.11 Future punishment                                         | <input type="checkbox"/>            |                     |
| 1.7 Review outcome goal(s)                                   | <input checked="" type="checkbox"/> |                           | 11. Regulation                                                  |                                     |                     |
| 1.8 Behavioral contract                                      | <input type="checkbox"/>            |                           | 11.1 Pharmacological<br>support                                 | <input type="checkbox"/>            |                     |
| 1.9 Commitment                                               | <input checked="" type="checkbox"/> |                           | 11.2 Reduce negative<br>emotions                                | <input checked="" type="checkbox"/> | rates stress levels |
| 2. Feedback and monitoring                                   |                                     |                           | 11.3 Conserving mental<br>resources                             | <input checked="" type="checkbox"/> |                     |
| 2.1 Monitoring of behavior by<br>others without feedback     | <input type="checkbox"/>            |                           | 11.4 Paradoxical instructions                                   | <input type="checkbox"/>            |                     |
| 2.2 Feedback on behavior                                     | <input checked="" type="checkbox"/> |                           | 12. Antecedents                                                 |                                     |                     |
| 2.3 Self-monitoring of behavior                              | <input checked="" type="checkbox"/> |                           | 12.1 Restructuring the<br>physical environment                  | <input checked="" type="checkbox"/> |                     |
| 2.4 Self-monitoring of<br>outcome(s) of behavior             | <input checked="" type="checkbox"/> |                           | 12.2 Restructuring the social<br>environment                    | <input type="checkbox"/>            |                     |
| 2.5 Monitoring of outcome(s)<br>of behavior without feedback | <input checked="" type="checkbox"/> |                           | 12.3 Avoidance/reducing<br>exposure to cues for the<br>behavior | <input type="checkbox"/>            |                     |
| 2.6 Biofeedback                                              | <input checked="" type="checkbox"/> | heart rate                | 12.4 Distraction                                                | <input type="checkbox"/>            |                     |
| 2.7 Feedback on outcome(s) of<br>behavior                    | <input type="checkbox"/>            |                           | 12.5 Adding objects to the<br>environment                       | <input checked="" type="checkbox"/> |                     |
| 3. Social support                                            |                                     |                           | 12.6 Body changes                                               | <input type="checkbox"/>            |                     |
| 3.1. Social support<br>(unspecified)                         | <input checked="" type="checkbox"/> | see connection's activity | 13. Identity                                                    |                                     |                     |
| 3.2. Social support (practical)                              | <input type="checkbox"/>            |                           | 13.1 Identification of the self<br>as role model                | <input type="checkbox"/>            |                     |

**WEARABLE DEVICE: Vivomove HR****Reviewer:****Dr. Koyya, Maddison**

|                                                             |                                     |                                              |                                                 |                                     |  |
|-------------------------------------------------------------|-------------------------------------|----------------------------------------------|-------------------------------------------------|-------------------------------------|--|
| 3.3. Social support (emotional)                             | <input checked="" type="checkbox"/> |                                              | 13.2 Framing/reframing                          | <input checked="" type="checkbox"/> |  |
| 4. Shaping knowledge                                        |                                     |                                              | 13.3 Incompatible beliefs                       | <input type="checkbox"/>            |  |
| 4.1 Instruction on how to perform the behavior              | <input checked="" type="checkbox"/> |                                              | 13.4 Valued self-identity                       | <input type="checkbox"/>            |  |
| 4.2 Information about antecedents                           | <input checked="" type="checkbox"/> |                                              | 13.5 Identity associated with changed behavior  | <input type="checkbox"/>            |  |
| 4.3 Re-attribution                                          | <input type="checkbox"/>            |                                              | 14. Scheduled consequences                      |                                     |  |
| 4.4 Behavioral experiments                                  | <input checked="" type="checkbox"/> |                                              | 14.1 Behavior cost                              | <input type="checkbox"/>            |  |
| 5. Natural consequences                                     |                                     |                                              | 14.2 Punishment                                 | <input type="checkbox"/>            |  |
| 5.1 Information about health consequences                   | <input checked="" type="checkbox"/> |                                              | 14.3 Remove reward                              | <input checked="" type="checkbox"/> |  |
| 5.2 Salience of consequences                                | <input type="checkbox"/>            |                                              | 14.4 Reward approximation                       | <input checked="" type="checkbox"/> |  |
| 5.3 Information about social and environmental consequences | <input type="checkbox"/>            |                                              | 14.5 Rewarding completion                       | <input checked="" type="checkbox"/> |  |
| 5.4 Monitoring of emotional consequences                    | <input type="checkbox"/>            |                                              | 14.6 Situation-specific reward                  | <input type="checkbox"/>            |  |
| 5.5 Anticipated regret                                      | <input type="checkbox"/>            |                                              | 14.7 Reward incompatible behavior               | <input type="checkbox"/>            |  |
| 5.6 Information about emotional consequences                | <input type="checkbox"/>            |                                              | 14.8 Reward alternative behavior                | <input type="checkbox"/>            |  |
| 6. Comparison of behavior                                   |                                     |                                              | 14.9 Reduce reward frequency                    | <input type="checkbox"/>            |  |
| 6.1 Demonstration of the behavior                           | <input type="checkbox"/>            |                                              | 14.10 Remove punishment                         | <input type="checkbox"/>            |  |
| 6.2 Social comparison                                       | <input checked="" type="checkbox"/> | Insight comparison to people of same age/sex | 15. Self-belief                                 |                                     |  |
| 6.3 Information about others' approval                      | <input type="checkbox"/>            |                                              | 15.1 Verbal persuasion about capability         | <input type="checkbox"/>            |  |
| 7. Associations                                             |                                     |                                              | 15.2 Mental rehearsal of successful performance | <input checked="" type="checkbox"/> |  |
| 7.1 Prompts/cues                                            | <input checked="" type="checkbox"/> | sedentary alerts to take steps               | 15.3 Focus on past success                      | <input checked="" type="checkbox"/> |  |
| 7.2 Cue signaling reward                                    | <input checked="" type="checkbox"/> |                                              | 15.4 Self-talk                                  | <input type="checkbox"/>            |  |
| 7.3 Reduce prompts/cues                                     | <input checked="" type="checkbox"/> |                                              | 16. Covert learning                             | <input type="checkbox"/>            |  |
| 7.4 Remove access to the reward                             | <input type="checkbox"/>            |                                              | 16.1 Imaginary punishment                       | <input type="checkbox"/>            |  |

**WEARABLE DEVICE:** Vivomove HR

**Reviewer:** Dr. Koyya, Maddison

|                                              |                                     |  |                                             |                                     |                                        |
|----------------------------------------------|-------------------------------------|--|---------------------------------------------|-------------------------------------|----------------------------------------|
| 7.5 Remove aversive stimulus                 | <input type="checkbox"/>            |  | 16.2 Imaginary reward                       | <input type="checkbox"/>            |                                        |
| 7.6 Satiation                                | <input type="checkbox"/>            |  | 16.3 Vicarious consequences                 | <input type="checkbox"/>            |                                        |
| 7.7 Exposure                                 | <input type="checkbox"/>            |  | Functionality                               |                                     |                                        |
| 7.8 Associative learning                     | <input type="checkbox"/>            |  | Battery lasts <1 day                        | <input type="checkbox"/>            |                                        |
| 8 Repetition and substitution                |                                     |  | Battery lasts 1-2 days                      | <input type="checkbox"/>            |                                        |
| 8.1 Behavioral practice/rehearsal            | <input type="checkbox"/>            |  | Battery lasts 3-4 days                      | <input checked="" type="checkbox"/> |                                        |
| 8.2 Behavior substitution                    | <input type="checkbox"/>            |  | Battery lasts 5-6 days                      | <input checked="" type="checkbox"/> | While wearing it to bed                |
| 8.3 Habit formation                          | <input checked="" type="checkbox"/> |  | Battery last $\geq 7$ days                  | <input type="checkbox"/>            |                                        |
| 8.4 Habit reversal                           | <input checked="" type="checkbox"/> |  | Device pairs with a phone/tablet            | <input checked="" type="checkbox"/> |                                        |
| 8.5 Overcorrection                           | <input type="checkbox"/>            |  | Device pairs with a computer                | <input type="checkbox"/>            |                                        |
| 8.6 Generalisation of target behavior        | <input type="checkbox"/>            |  | Device syncs with phone/table notifications | <input checked="" type="checkbox"/> |                                        |
| 8.7 Graded tasks                             | <input checked="" type="checkbox"/> |  | Device face activity display                | <input checked="" type="checkbox"/> |                                        |
| 9. Comparison of outcomes                    |                                     |  | Mobile app activity display                 | <input checked="" type="checkbox"/> |                                        |
| 9.1 Credible source                          | <input type="checkbox"/>            |  | Computer activity display                   | <input type="checkbox"/>            |                                        |
| 9.2 Pros and cons                            | <input type="checkbox"/>            |  | Wrist worn                                  | <input checked="" type="checkbox"/> |                                        |
| 9.3 Comparative imagining of future outcomes | <input checked="" type="checkbox"/> |  | Other wear options                          | <input type="checkbox"/>            |                                        |
| 10. Reward and threat                        |                                     |  | Behavior monitoring                         |                                     |                                        |
| 10.1 Material incentive (behavior)           | <input type="checkbox"/>            |  | Sleep                                       | <input checked="" type="checkbox"/> |                                        |
| 10.2 Material reward (behavior)              | <input type="checkbox"/>            |  | Nutrition                                   | <input type="checkbox"/>            | Hydration, partners with MyFitness Pal |
| 10.3 Non-specific reward                     | <input checked="" type="checkbox"/> |  | Sedentary                                   | <input checked="" type="checkbox"/> |                                        |
| 10.4 Social reward                           | <input type="checkbox"/>            |  | Exercise (workout tracking)                 | <input checked="" type="checkbox"/> |                                        |

**Physical activity behaviors tracked:**

|                     |                                     |                         |                                     |                           |                                     |                            |                                     |                             |                                     |
|---------------------|-------------------------------------|-------------------------|-------------------------------------|---------------------------|-------------------------------------|----------------------------|-------------------------------------|-----------------------------|-------------------------------------|
| Steps per Day       | <input checked="" type="checkbox"/> | Minutes per Day (total) | <input checked="" type="checkbox"/> | Exercise minutes per Day  | <input checked="" type="checkbox"/> | Energy expenditure (total) | <input checked="" type="checkbox"/> | Exercise energy expenditure | <input checked="" type="checkbox"/> |
| Sitting (idle) time | <input type="checkbox"/>            | Heart rate              | <input checked="" type="checkbox"/> | Other: Menstrual tracking | <input checked="" type="checkbox"/> | Other: Stress              | <input checked="" type="checkbox"/> | Other: Floors               | <input checked="" type="checkbox"/> |

**WEARABLE DEVICE:** Garmin Vivosmart 4

**Reviewer:** Dr. Koyya, Maddison, Grace

|                                                              | BCT<br>present?                     | Comments                  |                                                                 | BCT<br>present?                     | Comments                           |
|--------------------------------------------------------------|-------------------------------------|---------------------------|-----------------------------------------------------------------|-------------------------------------|------------------------------------|
| 1. Goals and planning                                        |                                     |                           | 10.5 Social incentive                                           | <input type="checkbox"/>            |                                    |
| 1.1 Goal setting (behavior)                                  | <input checked="" type="checkbox"/> | Auto or custom            | 10.6 Non-specific incentive                                     | <input checked="" type="checkbox"/> |                                    |
| 1.2 Problem solving                                          | <input type="checkbox"/>            |                           | 10.7 Self-incentive                                             | <input type="checkbox"/>            |                                    |
| 1.3 Goal setting (outcome)                                   | <input checked="" type="checkbox"/> |                           | 10.8 Incentive (outcome)                                        | <input type="checkbox"/>            |                                    |
| 1.4 Action planning                                          | <input type="checkbox"/>            |                           | 10.9 Self-reward                                                | <input type="checkbox"/>            |                                    |
| 1.5 Review behavior goal(s)                                  | <input checked="" type="checkbox"/> |                           | 10.10 Reward (outcome)                                          | <input checked="" type="checkbox"/> |                                    |
| 1.6 Discrepancy between<br>current behavior and goal         | <input checked="" type="checkbox"/> |                           | 10.11 Future punishment                                         | <input type="checkbox"/>            |                                    |
| 1.7 Review outcome goal(s)                                   | <input type="checkbox"/>            |                           | 11. Regulation                                                  |                                     |                                    |
| 1.8 Behavioral contract                                      | <input type="checkbox"/>            |                           | 11.1 Pharmacological<br>support                                 | <input type="checkbox"/>            |                                    |
| 1.9 Commitment                                               | <input checked="" type="checkbox"/> |                           | 11.2 Reduce negative<br>emotions                                | <input checked="" type="checkbox"/> | stress details                     |
| 2. Feedback and monitoring                                   |                                     |                           | 11.3 Conserving mental<br>resources                             | <input checked="" type="checkbox"/> | relax reminders-- guided breathing |
| 2.1 Monitoring of behavior by<br>others without feedback     | <input type="checkbox"/>            |                           | 11.4 Paradoxical instructions                                   | <input type="checkbox"/>            |                                    |
| 2.2 Feedback on behavior                                     | <input checked="" type="checkbox"/> |                           | 12. Antecedents                                                 |                                     |                                    |
| 2.3 Self-monitoring of behavior                              | <input checked="" type="checkbox"/> |                           | 12.1 Restructuring the<br>physical environment                  | <input checked="" type="checkbox"/> |                                    |
| 2.4 Self-monitoring of<br>outcome(s) of behavior             | <input checked="" type="checkbox"/> |                           | 12.2 Restructuring the social<br>environment                    | <input type="checkbox"/>            |                                    |
| 2.5 Monitoring of outcome(s)<br>of behavior without feedback | <input checked="" type="checkbox"/> |                           | 12.3 Avoidance/reducing<br>exposure to cues for the<br>behavior | <input type="checkbox"/>            |                                    |
| 2.6 Biofeedback                                              | <input checked="" type="checkbox"/> | heart rate and oxygen     | 12.4 Distraction                                                | <input type="checkbox"/>            |                                    |
| 2.7 Feedback on outcome(s) of<br>behavior                    | <input type="checkbox"/>            |                           | 12.5 Adding objects to the<br>environment                       | <input checked="" type="checkbox"/> |                                    |
| 3. Social support                                            |                                     |                           | 12.6 Body changes                                               | <input type="checkbox"/>            |                                    |
| 3.1. Social support<br>(unspecified)                         | <input checked="" type="checkbox"/> | see connection's activity | 13. Identity                                                    |                                     |                                    |
| 3.2. Social support (practical)                              | <input type="checkbox"/>            |                           | 13.1 Identification of the self<br>as role model                | <input type="checkbox"/>            |                                    |

**WEARABLE DEVICE:** Garmin Vivosmart 4

**Reviewer:**

Dr. Koyya, Maddison, Grace

|                                                             |                                     |                                              |                                                 |                                     |  |
|-------------------------------------------------------------|-------------------------------------|----------------------------------------------|-------------------------------------------------|-------------------------------------|--|
| 3.3. Social support (emotional)                             | <input checked="" type="checkbox"/> |                                              | 13.2 Framing/reframing                          | <input checked="" type="checkbox"/> |  |
| 4. Shaping knowledge                                        |                                     |                                              | 13.3 Incompatible beliefs                       | <input type="checkbox"/>            |  |
| 4.1 Instruction on how to perform the behavior              | <input checked="" type="checkbox"/> | Find workouts                                | 13.4 Valued self-identity                       | <input type="checkbox"/>            |  |
| 4.2 Information about antecedents                           | <input checked="" type="checkbox"/> |                                              | 13.5 Identity associated with changed behavior  | <input type="checkbox"/>            |  |
| 4.3 Re-attribution                                          | <input type="checkbox"/>            |                                              | 14. Scheduled consequences                      |                                     |  |
| 4.4 Behavioral experiments                                  | <input checked="" type="checkbox"/> |                                              | 14.1 Behavior cost                              | <input type="checkbox"/>            |  |
| 5. Natural consequences                                     |                                     |                                              | 14.2 Punishment                                 | <input type="checkbox"/>            |  |
| 5.1 Information about health consequences                   | <input checked="" type="checkbox"/> |                                              | 14.3 Remove reward                              | <input checked="" type="checkbox"/> |  |
| 5.2 Salience of consequences                                | <input type="checkbox"/>            |                                              | 14.4 Reward approximation                       | <input checked="" type="checkbox"/> |  |
| 5.3 Information about social and environmental consequences | <input type="checkbox"/>            |                                              | 14.5 Rewarding completion                       | <input checked="" type="checkbox"/> |  |
| 5.4 Monitoring of emotional consequences                    | <input type="checkbox"/>            |                                              | 14.6 Situation-specific reward                  | <input type="checkbox"/>            |  |
| 5.5 Anticipated regret                                      | <input type="checkbox"/>            |                                              | 14.7 Reward incompatible behavior               | <input type="checkbox"/>            |  |
| 5.6 Information about emotional consequences                | <input type="checkbox"/>            |                                              | 14.8 Reward alternative behavior                | <input type="checkbox"/>            |  |
| 6. Comparison of behavior                                   |                                     |                                              | 14.9 Reduce reward frequency                    | <input type="checkbox"/>            |  |
| 6.1 Demonstration of the behavior                           | <input type="checkbox"/>            |                                              | 14.10 Remove punishment                         | <input type="checkbox"/>            |  |
| 6.2 Social comparison                                       | <input checked="" type="checkbox"/> | Insight comparison to people of same age/sex | 15. Self-belief                                 |                                     |  |
| 6.3 Information about others' approval                      | <input type="checkbox"/>            |                                              | 15.1 Verbal persuasion about capability         | <input type="checkbox"/>            |  |
| 7. Associations                                             |                                     |                                              | 15.2 Mental rehearsal of successful performance | <input checked="" type="checkbox"/> |  |
| 7.1 Prompts/cues                                            | <input checked="" type="checkbox"/> |                                              | 15.3 Focus on past success                      | <input checked="" type="checkbox"/> |  |
| 7.2 Cue signaling reward                                    | <input checked="" type="checkbox"/> |                                              | 15.4 Self-talk                                  | <input type="checkbox"/>            |  |
| 7.3 Reduce prompts/cues                                     | <input type="checkbox"/>            |                                              | 16. Covert learning                             | <input type="checkbox"/>            |  |
| 7.4 Remove access to the reward                             | <input type="checkbox"/>            |                                              | 16.1 Imaginary punishment                       | <input type="checkbox"/>            |  |

**WEARABLE DEVICE:** Garmin Vivosmart 4

**Reviewer:** Dr. Koyya, Maddison, Grace

|                                              |                                     |  |                                             |                                     |                             |
|----------------------------------------------|-------------------------------------|--|---------------------------------------------|-------------------------------------|-----------------------------|
| 7.5 Remove aversive stimulus                 | <input type="checkbox"/>            |  | 16.2 Imaginary reward                       | <input type="checkbox"/>            |                             |
| 7.6 Satiation                                | <input type="checkbox"/>            |  | 16.3 Vicarious consequences                 | <input type="checkbox"/>            |                             |
| 7.7 Exposure                                 | <input type="checkbox"/>            |  | Functionality                               |                                     |                             |
| 7.8 Associative learning                     | <input type="checkbox"/>            |  | Battery lasts <1 day                        | <input type="checkbox"/>            |                             |
| 8 Repetition and substitution                |                                     |  | Battery lasts 1-2 days                      | <input type="checkbox"/>            |                             |
| 8.1 Behavioral practice/rehearsal            | <input type="checkbox"/>            |  | Battery lasts 3-4 days                      | <input checked="" type="checkbox"/> |                             |
| 8.2 Behavior substitution                    | <input type="checkbox"/>            |  | Battery lasts 5-6 days                      | <input type="checkbox"/>            |                             |
| 8.3 Habit formation                          | <input checked="" type="checkbox"/> |  | Battery last $\geq 7$ days                  | <input type="checkbox"/>            |                             |
| 8.4 Habit reversal                           | <input checked="" type="checkbox"/> |  | Device pairs with a phone/tablet            | <input checked="" type="checkbox"/> |                             |
| 8.5 Overcorrection                           | <input type="checkbox"/>            |  | Device pairs with a computer                | <input type="checkbox"/>            |                             |
| 8.6 Generalisation of target behavior        | <input type="checkbox"/>            |  | Device syncs with phone/table notifications | <input checked="" type="checkbox"/> |                             |
| 8.7 Graded tasks                             | <input checked="" type="checkbox"/> |  | Device face activity display                | <input checked="" type="checkbox"/> |                             |
| 9. Comparison of outcomes                    |                                     |  | Mobile app activity display                 | <input checked="" type="checkbox"/> |                             |
| 9.1 Credible source                          | <input type="checkbox"/>            |  | Computer activity display                   | <input type="checkbox"/>            |                             |
| 9.2 Pros and cons                            | <input type="checkbox"/>            |  | Wrist worn                                  | <input checked="" type="checkbox"/> |                             |
| 9.3 Comparative imagining of future outcomes | <input checked="" type="checkbox"/> |  | Other wear options                          | <input type="checkbox"/>            |                             |
| 10. Reward and threat                        |                                     |  | Behavior monitoring                         |                                     |                             |
| 10.1 Material incentive (behavior)           | <input type="checkbox"/>            |  | Sleep                                       | <input checked="" type="checkbox"/> |                             |
| 10.2 Material reward (behavior)              | <input type="checkbox"/>            |  | Nutrition                                   | <input type="checkbox"/>            | Partners with MyFitness Pal |
| 10.3 Non-specific reward                     | <input checked="" type="checkbox"/> |  | Sedentary                                   | <input checked="" type="checkbox"/> |                             |
| 10.4 Social reward                           | <input type="checkbox"/>            |  | Exercise (workout tracking)                 | <input checked="" type="checkbox"/> | Auto-detect activities      |

**Physical activity behaviors tracked:**

|                     |                                     |                         |                                     |                                |                                     |                            |                                     |                             |                                     |
|---------------------|-------------------------------------|-------------------------|-------------------------------------|--------------------------------|-------------------------------------|----------------------------|-------------------------------------|-----------------------------|-------------------------------------|
| Steps per Day       | <input checked="" type="checkbox"/> | Minutes per Day (total) | <input checked="" type="checkbox"/> | Exercise minutes per Day       | <input checked="" type="checkbox"/> | Energy expenditure (total) | <input checked="" type="checkbox"/> | Exercise energy expenditure | <input checked="" type="checkbox"/> |
| Sitting (idle) time | <input type="checkbox"/>            | Heart rate              | <input checked="" type="checkbox"/> | Other: Stress; menstrual cycle | <input checked="" type="checkbox"/> | Other: Hydration           | <input checked="" type="checkbox"/> | Other: Floors               | <input checked="" type="checkbox"/> |



**WEARABLE DEVICE:** Withings Steel Active

**Reviewer:** Dr. Koyya, Maddison, Grace

|                                                              | BCT<br>present?                     | Comments                                     |                                                                 | BCT<br>present?                     | Comments          |
|--------------------------------------------------------------|-------------------------------------|----------------------------------------------|-----------------------------------------------------------------|-------------------------------------|-------------------|
| 1. Goals and planning                                        |                                     |                                              | 10.5 Social incentive                                           | <input type="checkbox"/>            |                   |
| 1.1 Goal setting (behavior)                                  | <input checked="" type="checkbox"/> | Self-selected                                | 10.6 Non-specific incentive                                     | <input checked="" type="checkbox"/> |                   |
| 1.2 Problem solving                                          | <input type="checkbox"/>            |                                              | 10.7 Self-incentive                                             | <input type="checkbox"/>            |                   |
| 1.3 Goal setting (outcome)                                   | <input type="checkbox"/>            |                                              | 10.8 Incentive (outcome)                                        | <input type="checkbox"/>            |                   |
| 1.4 Action planning                                          | <input type="checkbox"/>            |                                              | 10.9 Self-reward                                                | <input type="checkbox"/>            |                   |
| 1.5 Review behavior goal(s)                                  | <input checked="" type="checkbox"/> |                                              | 10.10 Reward (outcome)                                          | <input type="checkbox"/>            |                   |
| 1.6 Discrepancy between<br>current behavior and goal         | <input checked="" type="checkbox"/> |                                              | 10.11 Future punishment                                         | <input type="checkbox"/>            |                   |
| 1.7 Review outcome goal(s)                                   | <input type="checkbox"/>            |                                              | 11. Regulation                                                  |                                     |                   |
| 1.8 Behavioral contract                                      | <input checked="" type="checkbox"/> | Agreeing on a step goal                      | 11.1 Pharmacological<br>support                                 | <input type="checkbox"/>            |                   |
| 1.9 Commitment                                               | <input checked="" type="checkbox"/> |                                              | 11.2 Reduce negative<br>emotions                                | <input checked="" type="checkbox"/> | Meditation option |
| 2. Feedback and monitoring                                   |                                     |                                              | 11.3 Conserving mental<br>resources                             | <input type="checkbox"/>            |                   |
| 2.1 Monitoring of behavior by<br>others without feedback     | <input type="checkbox"/>            |                                              | 11.4 Paradoxical instructions                                   | <input type="checkbox"/>            |                   |
| 2.2 Feedback on behavior                                     | <input checked="" type="checkbox"/> |                                              | 12. Antecedents                                                 |                                     |                   |
| 2.3 Self-monitoring of behavior                              | <input checked="" type="checkbox"/> |                                              | 12.1 Restructuring the<br>physical environment                  | <input checked="" type="checkbox"/> |                   |
| 2.4 Self-monitoring of<br>outcome(s) of behavior             | <input type="checkbox"/>            |                                              | 12.2 Restructuring the social<br>environment                    | <input type="checkbox"/>            |                   |
| 2.5 Monitoring of outcome(s)<br>of behavior without feedback | <input type="checkbox"/>            |                                              | 12.3 Avoidance/reducing<br>exposure to cues for the<br>behavior | <input type="checkbox"/>            |                   |
| 2.6 Biofeedback                                              | <input checked="" type="checkbox"/> | heart rate                                   | 12.4 Distraction                                                | <input type="checkbox"/>            |                   |
| 2.7 Feedback on outcome(s) of<br>behavior                    | <input type="checkbox"/>            |                                              | 12.5 Adding objects to the<br>environment                       | <input checked="" type="checkbox"/> |                   |
| 3. Social support                                            |                                     |                                              | 12.6 Body changes                                               | <input type="checkbox"/>            |                   |
| 3.1. Social support<br>(unspecified)                         | <input checked="" type="checkbox"/> | Leader-board competition with friends/family | 13. Identity                                                    |                                     |                   |
| 3.2. Social support (practical)                              | <input type="checkbox"/>            |                                              | 13.1 Identification of the self<br>as role model                | <input type="checkbox"/>            |                   |

**WEARABLE DEVICE: Withings Steel Active****Reviewer:****Dr. Koyya, Maddison, Grace**

|                                                             |                                     |                                 |                                                 |                                     |  |
|-------------------------------------------------------------|-------------------------------------|---------------------------------|-------------------------------------------------|-------------------------------------|--|
| 3.3. Social support (emotional)                             | <input type="checkbox"/>            |                                 | 13.2 Framing/reframing                          | <input type="checkbox"/>            |  |
| 4. Shaping knowledge                                        |                                     |                                 | 13.3 Incompatible beliefs                       | <input type="checkbox"/>            |  |
| 4.1 Instruction on how to perform the behavior              | <input checked="" type="checkbox"/> |                                 | 13.4 Valued self-identity                       | <input type="checkbox"/>            |  |
| 4.2 Information about antecedents                           | <input type="checkbox"/>            |                                 | 13.5 Identity associated with changed behavior  | <input type="checkbox"/>            |  |
| 4.3 Re-attribution                                          | <input type="checkbox"/>            |                                 | 14. Scheduled consequences                      |                                     |  |
| 4.4 Behavioral experiments                                  | <input type="checkbox"/>            |                                 | 14.1 Behavior cost                              | <input type="checkbox"/>            |  |
| 5. Natural consequences                                     |                                     |                                 | 14.2 Punishment                                 | <input type="checkbox"/>            |  |
| 5.1 Information about health consequences                   | <input type="checkbox"/>            |                                 | 14.3 Remove reward                              | <input type="checkbox"/>            |  |
| 5.2 Salience of consequences                                | <input type="checkbox"/>            |                                 | 14.4 Reward approximation                       | <input type="checkbox"/>            |  |
| 5.3 Information about social and environmental consequences | <input type="checkbox"/>            |                                 | 14.5 Rewarding completion                       | <input checked="" type="checkbox"/> |  |
| 5.4 Monitoring of emotional consequences                    | <input type="checkbox"/>            |                                 | 14.6 Situation-specific reward                  | <input type="checkbox"/>            |  |
| 5.5 Anticipated regret                                      | <input type="checkbox"/>            |                                 | 14.7 Reward incompatible behavior               | <input type="checkbox"/>            |  |
| 5.6 Information about emotional consequences                | <input type="checkbox"/>            |                                 | 14.8 Reward alternative behavior                | <input type="checkbox"/>            |  |
| 6. Comparison of behavior                                   |                                     |                                 | 14.9 Reduce reward frequency                    | <input type="checkbox"/>            |  |
| 6.1 Demonstration of the behavior                           | <input type="checkbox"/>            |                                 | 14.10 Remove punishment                         | <input type="checkbox"/>            |  |
| 6.2 Social comparison                                       | <input checked="" type="checkbox"/> |                                 | 15. Self-belief                                 |                                     |  |
| 6.3 Information about others' approval                      | <input type="checkbox"/>            |                                 | 15.1 Verbal persuasion about capability         | <input type="checkbox"/>            |  |
| 7. Associations                                             |                                     |                                 | 15.2 Mental rehearsal of successful performance | <input type="checkbox"/>            |  |
| 7.1 Prompts/cues                                            | <input checked="" type="checkbox"/> | Personally set health reminders | 15.3 Focus on past success                      | <input type="checkbox"/>            |  |
| 7.2 Cue signaling reward                                    | <input type="checkbox"/>            |                                 | 15.4 Self-talk                                  | <input type="checkbox"/>            |  |
| 7.3 Reduce prompts/cues                                     | <input type="checkbox"/>            |                                 | 16. Covert learning                             | <input type="checkbox"/>            |  |
| 7.4 Remove access to the reward                             | <input type="checkbox"/>            |                                 | 16.1 Imaginary punishment                       | <input type="checkbox"/>            |  |

**WEARABLE DEVICE:** Withings Steel Active

**Reviewer:** Dr. Koyya, Maddison, Grace

|                                              |                                     |                |                                             |                                     |                                       |
|----------------------------------------------|-------------------------------------|----------------|---------------------------------------------|-------------------------------------|---------------------------------------|
| 7.5 Remove aversive stimulus                 | <input type="checkbox"/>            |                | 16.2 Imaginary reward                       | <input type="checkbox"/>            |                                       |
| 7.6 Satiation                                | <input type="checkbox"/>            |                | 16.3 Vicarious consequences                 | <input type="checkbox"/>            |                                       |
| 7.7 Exposure                                 | <input type="checkbox"/>            |                | Functionality                               |                                     |                                       |
| 7.8 Associative learning                     | <input type="checkbox"/>            |                | Battery lasts <1 day                        | <input type="checkbox"/>            |                                       |
| 8 Repetition and substitution                |                                     |                | Battery lasts 1-2 days                      | <input type="checkbox"/>            |                                       |
| 8.1 Behavioral practice/rehearsal            | <input type="checkbox"/>            |                | Battery lasts 3-4 days                      | <input type="checkbox"/>            |                                       |
| 8.2 Behavior substitution                    | <input type="checkbox"/>            |                | Battery lasts 5-6 days                      | <input type="checkbox"/>            |                                       |
| 8.3 Habit formation                          | <input checked="" type="checkbox"/> |                | Battery last $\geq 7$ days                  | <input checked="" type="checkbox"/> | After 2 weeks, the battery was at 95% |
| 8.4 Habit reversal                           | <input type="checkbox"/>            |                | Device pairs with a phone/tablet            | <input checked="" type="checkbox"/> |                                       |
| 8.5 Overcorrection                           | <input type="checkbox"/>            |                | Device pairs with a computer                | <input type="checkbox"/>            |                                       |
| 8.6 Generalisation of target behavior        | <input type="checkbox"/>            |                | Device syncs with phone/table notifications | <input checked="" type="checkbox"/> |                                       |
| 8.7 Graded tasks                             | <input type="checkbox"/>            |                | Device face activity display                | <input checked="" type="checkbox"/> |                                       |
| 9. Comparison of outcomes                    |                                     |                | Mobile app activity display                 | <input checked="" type="checkbox"/> |                                       |
| 9.1 Credible source                          | <input type="checkbox"/>            |                | Computer activity display                   | <input type="checkbox"/>            |                                       |
| 9.2 Pros and cons                            | <input type="checkbox"/>            |                | Wrist worn                                  | <input checked="" type="checkbox"/> |                                       |
| 9.3 Comparative imagining of future outcomes | <input type="checkbox"/>            |                | Other wear options                          | <input type="checkbox"/>            |                                       |
| 10. Reward and threat                        |                                     |                | Behavior monitoring                         |                                     |                                       |
| 10.1 Material incentive (behavior)           | <input type="checkbox"/>            |                | Sleep                                       | <input checked="" type="checkbox"/> |                                       |
| 10.2 Material reward (behavior)              | <input type="checkbox"/>            |                | Nutrition                                   | <input checked="" type="checkbox"/> |                                       |
| 10.3 Non-specific reward                     | <input checked="" type="checkbox"/> | Virtual badges | Sedentary                                   | <input checked="" type="checkbox"/> |                                       |
| 10.4 Social reward                           | <input type="checkbox"/>            |                | Exercise (workout tracking)                 | <input checked="" type="checkbox"/> |                                       |

**Physical activity behaviors tracked:**

|                     |                                     |                         |                                     |                           |                                     |                            |                                     |                             |                                     |
|---------------------|-------------------------------------|-------------------------|-------------------------------------|---------------------------|-------------------------------------|----------------------------|-------------------------------------|-----------------------------|-------------------------------------|
| Steps per Day       | <input checked="" type="checkbox"/> | Minutes per Day (total) | <input checked="" type="checkbox"/> | Exercise minutes per Day  | <input checked="" type="checkbox"/> | Energy expenditure (total) | <input checked="" type="checkbox"/> | Exercise energy expenditure | <input checked="" type="checkbox"/> |
| Sitting (idle) time | <input type="checkbox"/>            | Heart rate              | <input checked="" type="checkbox"/> | Other: Pregnancy tracking | <input checked="" type="checkbox"/> | Other: Blood pressure      | <input checked="" type="checkbox"/> | Other: distance             | <input checked="" type="checkbox"/> |
