# Supplementary material
Source: MDPI journal article supplement (https://www.mdpi.com/2227-7080/8/4/75)
Supplement: s1 [file s1]

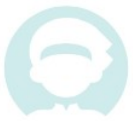

fitbit

7.1 Prompts/cues

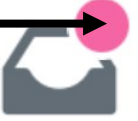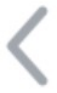

SAT, JAN 18

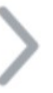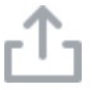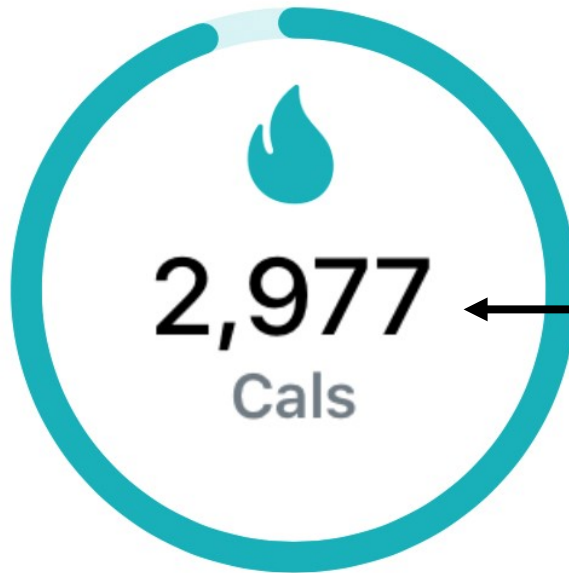

2.3 Self-monitoring  
of behavior

1.5 Review  
behavior goal

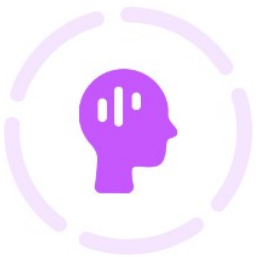

**Track your mindfulness**

5 days left this week

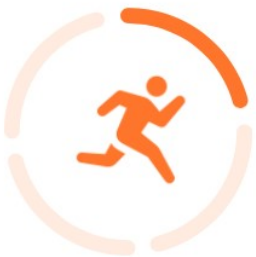

**1 of 4 days**

of exercise this week

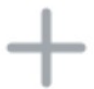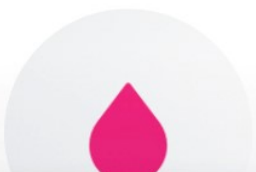

Log your period

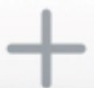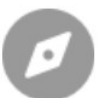

Discover

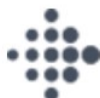

Today

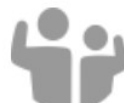

Community

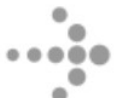

Premium

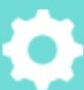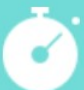

Jan 12 – 18

29 min

1.6 Discrepancy  
between current  
behavior and goal

1 of 4

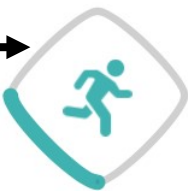

Days

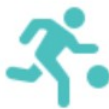

Sport

Jan 12 at 9:10 AM

🕒 29 min

🔥 246 calories

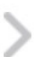

❤️ 116 avg bpm

100% Fat Burn

Jan 5 – 11

30 min

1 of 4

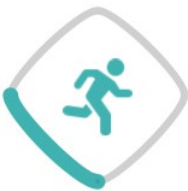

Days

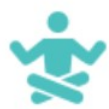

Yoga

Jan 5 at 8:29 PM

🕒 30 min

🔥 196 calories

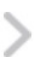

❤️ 103 avg bpm

56% Fat Burn

2.6 Biofeedback

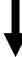

Dec 29, 2019 – Jan 4, 2020

45 min

2 of 4

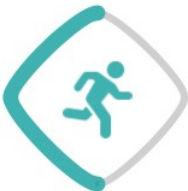

Days

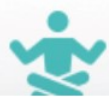

Yoga

Jan 4 at 8:10 PM

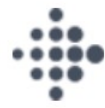

Today

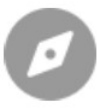

Discover

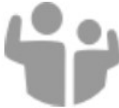

Community

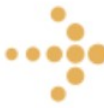

Premium

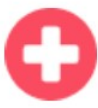

COVID-19

# Discover

## Featured

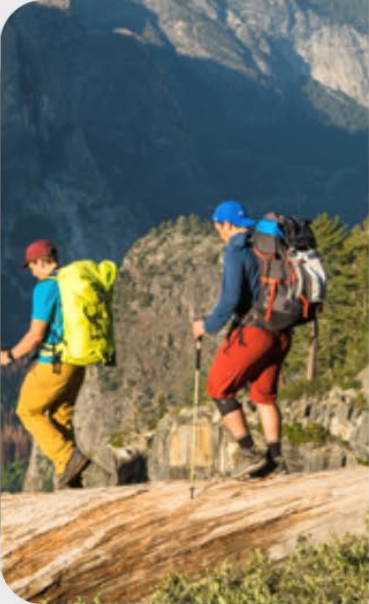

62,500 STEPS

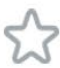

Pohono Trail

START

## Guided Programs

4.1 Instruction on how to perform the behavior

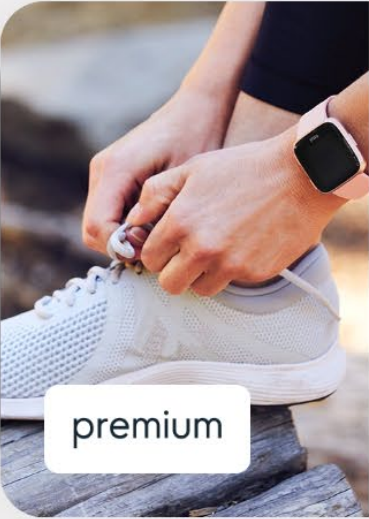

premium

2 WEEKS

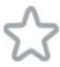

Get Active

START

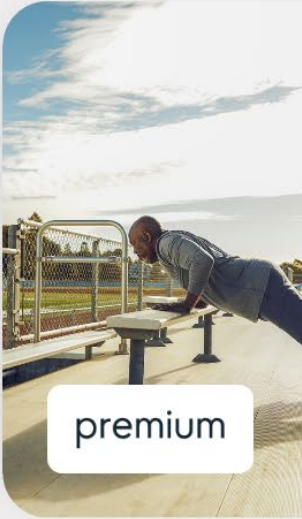

premium

See All

## Challenges & Adventures

10.6 Non-specific incentive

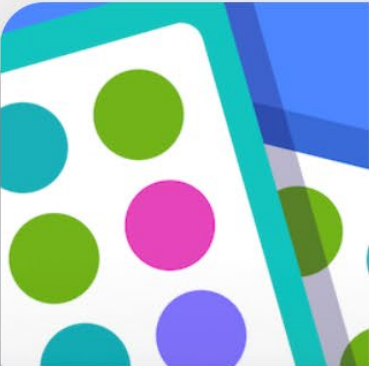

1 HOUR - 30 DAYS

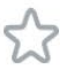

Get Fit Bingo

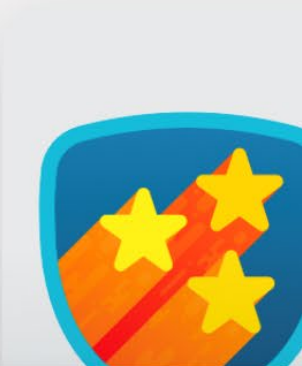

See All

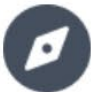

Discover

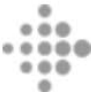

Today

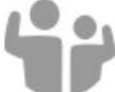

Community

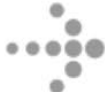

Premium

Feed

Friends

Groups

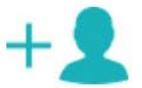

What are you up to?

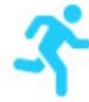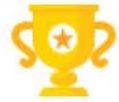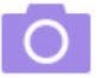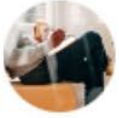

Popular conversation in At Work

3.2 Social support

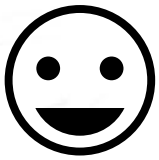

Shared with At Work

Monarch migration.

# Monarch Migration

2,500 lifetime miles

10.3 Non-specific  
reward

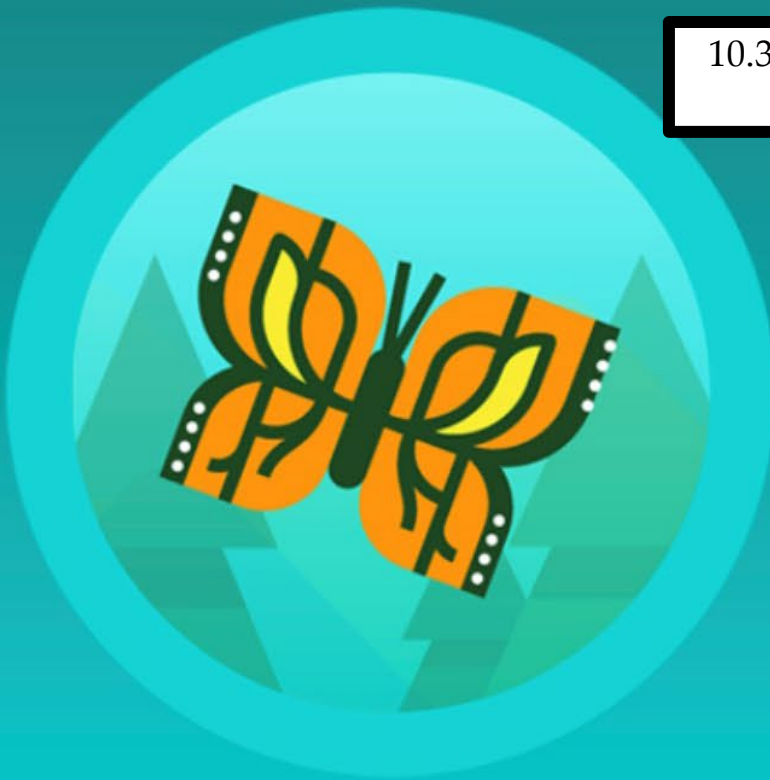

fitbit

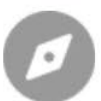

Discover

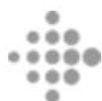

Today

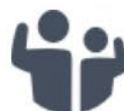

Community

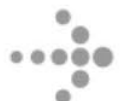

Premium
