# Supplementary material
Source: MDPI journal article supplement (https://www.mdpi.com/2227-7080/8/4/75)
Supplement: s1 [file s1]

Archive with 3 entries (3 files):
- Additional File 1_ complete coding table.doc
- Additional File 2_ complete coding sheets.pdf
- Additional file 3_Behavior change technique examples in EAM.pdf
